# Supplementary material for: Characterization of putative DD-carboxypeptidase-encoding genes in Mycobacterium smegmatis
Source: PubMed Central journal article supplement (PMC6435803; doi:10.1038/s41598-019-41001-x), 2019-03-26
Supplement: 41598_2019_41001_MOESM1_ESM.pdf [file 41598_2019_41001_MOESM1_ESM.pdf]

## Supplementary Tables

**Table S1.** Bacterial strains and plasmids used in this study.

| Name                                  | Description                                                                                                                                                                                                                                                                                                                                                                  | Source/Reference |
|---------------------------------------|------------------------------------------------------------------------------------------------------------------------------------------------------------------------------------------------------------------------------------------------------------------------------------------------------------------------------------------------------------------------------|------------------|
| <u>Strains</u>                        |                                                                                                                                                                                                                                                                                                                                                                              |                  |
| <u><i>M. smegmatis</i></u>            |                                                                                                                                                                                                                                                                                                                                                                              |                  |
| mc <sup>2</sup> 155                   | <i>ept-1</i> (efficient plasmid transformation) mutant of mc <sup>2</sup> 6                                                                                                                                                                                                                                                                                                  | <sup>1</sup>     |
| Δ2432                                 | Derivative of mc <sup>2</sup> 155 carrying an unmarked, out-of-frame deletion in <i>M. smegmatis</i> Msmeg_2432 (786bp internal region excised)                                                                                                                                                                                                                              | This work        |
| Δ2433                                 | Derivative of mc <sup>2</sup> 155 carrying an unmarked, out-of-frame deletion in <i>M. smegmatis</i> Msmeg_2433 (870bp internal region excised)                                                                                                                                                                                                                              | This work        |
| Δ1661                                 | Derivative of mc <sup>2</sup> 155 carrying an unmarked, in-frame deletion in <i>M. smegmatis</i> Msmeg_1661 (1158bp internal region excised)                                                                                                                                                                                                                                 | This work        |
| Δ <i>dacB</i> TetO                    | Derivative of mc <sup>2</sup> 155 in which the native promoter of Msmeg_6113 ( <i>dacB</i> ) is substituted with Pmyc1tetO. The native promoter regulates expression of a truncated (350 bp) 5' region of <i>dacB</i> ; Hyg <sup>r</sup> . This strain contains no Anhydrotetracycline-responsive repressor in the L5 attB site thus termed repressor-less.                  | This work        |
| Δ <i>dacB</i> TetON <sub>s</sub>      | Derivative of mc <sup>2</sup> 155 in which the native promoter of Msmeg_6113 ( <i>dacB</i> ) is substituted with Pmyc1tetO. The native promoter regulates expression of a truncated (350 bp) 5' region of <i>dacB</i> ; Hyg <sup>r</sup> . This strain contains the “strong” Anhydrotetracycline-responsive repressor (tetR) in the L5 attB site derived from pMC1s.         | This work        |
| Δ <i>dacB</i> TetOFF                  | Derivative of mc <sup>2</sup> 155 in which the native promoter of Msmeg_6113 ( <i>dacB</i> ) is substituted with Pmyc1tetO. The native promoter regulates expression of a truncated (350 bp) 5' region of <i>dacB</i> ; Hyg <sup>r</sup> . This strain contains the “reverse” Anhydrotetracycline-responsive repressor (revtetR) in the L5 attB site derived from pTEK-4S0X. | This work        |
| Δ <i>dacB</i> attB::pMV <i>dacB</i>   | Derivative of mc <sup>2</sup> 155 carrying native <i>dacB</i> , Δ <i>dacB</i> and additional copy of native <i>dacB</i> in the L5 attB site. Strain was constructed by electroporation with pMV <i>dacB</i> and p2Δ <i>dacBg</i> 17 vectors; Hyg <sup>r</sup> , Km <sup>r</sup> .                                                                                            | This work        |
| Δ <i>dacB</i> attB::pMVRv3627c_operon | Derivative of mc <sup>2</sup> 155 carrying native <i>dacB</i> , Δ <i>dacB</i> and additional copy of homologous operon from <i>M. tuberculosis</i> in the L5 attB site. Strain was constructed by electroporation with pMVRv3627c_operon and p2Δ <i>dacBg</i> 17 vectors; Hyg <sup>r</sup> , Km <sup>r</sup> .                                                               | This work        |

Plasmids

|                   |                                                                                                                                                                                                                                                                                                                                                                                                                                                                |            |
|-------------------|----------------------------------------------------------------------------------------------------------------------------------------------------------------------------------------------------------------------------------------------------------------------------------------------------------------------------------------------------------------------------------------------------------------------------------------------------------------|------------|
| p2NIL             | <i>E. coli</i> cloning vector, Kan <sup>r</sup>                                                                                                                                                                                                                                                                                                                                                                                                                | 2          |
| pMV306H           | <i>E. coli</i> -Mycobacterium integrating shuttle vector. Integrates in the L5 <i>attB</i> site in mycobacteria.                                                                                                                                                                                                                                                                                                                                               | H. Boshoff |
| pMVDacB           | Derivative of pMV306 (3 <sup>rd</sup> ) carrying a <i>hyg</i> gene; Hyg <sup>r</sup><br>Derivative of pMV306H carrying full-length <i>dacB</i> (1443 bp) plus 150 bp upstream of start codon representative of native promoter sequence; Hyg <sup>r</sup>                                                                                                                                                                                                      | This work  |
| pMVRv3627c_operon | Derivative of pMV306H carrying four gene operon (Rv3627c, Rv3626c, Rv3625c ( <i>mesJ</i> ) and Rv3624c ( <i>hpt</i> )) from <i>M. tuberculosis</i> ; Hyg <sup>r</sup>                                                                                                                                                                                                                                                                                          | This work  |
| pMV1661           | Derivative of pMV306H carrying full-length MSEMG_1661 (1194 bp) plus 150 bp upstream of start codon representative of native promoter sequence; Hyg <sup>r</sup>                                                                                                                                                                                                                                                                                               | This work  |
| pMV2432           | Derivative of pMV306H carrying full-length MSMEG_2432 and MSMEG_2433 (1788 bp) plus 150 bp upstream of start codon representative of native promoter sequence; Hyg <sup>r</sup>                                                                                                                                                                                                                                                                                | This work  |
| pMV2433           | Derivative of pMV306H carrying full-length MSMEG_2433 (891 bp) plus 150 bp upstream of start codon representative of native promoter sequence; Hyg <sup>r</sup>                                                                                                                                                                                                                                                                                                | This work  |
| pGOAL17           | Plasmid carrying <i>lacZ</i> and <i>sacB</i> markers as a <i>PacI</i> cassette; Km <sup>r</sup>                                                                                                                                                                                                                                                                                                                                                                | 2          |
| pGOAL19           | Plasmid carrying <i>lacZ-sacB-Hyg<sup>r</sup></i> markers as a <i>PacI</i> cassette; Hyg <sup>r</sup>                                                                                                                                                                                                                                                                                                                                                          | 2          |
| p2Δ2432           | Knockout vector for creating ΔMsmeg_2432 mutant. The 1.2 kb upstream region including 18 bp of the 5' sequence of Msmeg_2432 was PCR-amplified to incorporate <i>HindIII</i> and <i>NdeI</i> restriction sites. The 1.2 kb downstream was similarly obtained but incorporated <i>NdeI</i> and <i>Acc65I</i> restriction sites. The fragments were cloned into p2NIL and the <i>PacI</i> cassette from pGOAL19 was inserted; Km <sup>r</sup> Hyg <sup>r</sup> . | This work  |
| p2Δ2433           | Knockout vector for creating ΔMsmeg_2433 mutant. The 1.2 kb upstream region including 18 bp of the 5' sequence of Msmeg_2433 was PCR-amplified to incorporate <i>HindIII</i> and <i>NdeI</i> restriction sites. The 1.2 kb downstream was similarly obtained but incorporated <i>NdeI</i> and <i>Acc65I</i> restriction sites. The fragments were cloned into p2NIL and the <i>PacI</i> cassette from pGOAL19 was inserted; Km <sup>r</sup> Hyg <sup>r</sup> . | This work  |
| p2Δ1661           | Knockout vector for creating ΔMsmeg_1661 mutant. The 1.2 kb upstream region including 18 bp of the 5' sequence of Msmeg_2433 was PCR-amplified to incorporate <i>HindIII</i> and <i>NdeI</i> restriction sites. The 1.2 kb downstream was similarly obtained but incorporated <i>NdeI</i> and <i>Acc65I</i> restriction sites. The fragments were cloned into p2NIL and the <i>PacI</i> cassette from pGOAL19 was inserted; Km <sup>r</sup> Hyg <sup>r</sup> . | This work  |
| p2Δ <i>dacB</i>   | Knockout vector for creating ΔMsmeg_6113 ( <i>dacB</i> ) mutant. The 1.2 kb upstream region including 18 bp of the 5' sequence of Msmeg_2433 was PCR-amplified to incorporate <i>HindIII</i> and <i>NotI</i> restriction sites. The 1.2 kb downstream was similarly obtained but incorporated <i>NotI</i> and <i>Acc65I</i> restriction sites. The                                                                                                             | This work  |

---

|                            |                                                                                                                                                                                                                                                                                                                                                                                                                                                                                                                                                                                                             |             |
|----------------------------|-------------------------------------------------------------------------------------------------------------------------------------------------------------------------------------------------------------------------------------------------------------------------------------------------------------------------------------------------------------------------------------------------------------------------------------------------------------------------------------------------------------------------------------------------------------------------------------------------------------|-------------|
| p2 $\Delta$ <i>dacBg17</i> | <p>fragments were cloned into p2NIL and the <i>PacI</i> cassette from pGOAL19 was inserted; Km<sup>r</sup> Hyg<sup>r</sup>. Knockout vector for creating <math>\Delta</math>Msmeg_6113 (<i>dacB</i>) mutant. The 1.2 kb upstream region including 18 bp of the 5' sequence of Msmeg_2433 was PCR-amplified to incorporate <i>HindIII</i> and <i>NotI</i> restriction sites. The 1.2 kb downstream was similarly obtained but incorporated <i>NotI</i> and <i>Acc65I</i> restriction sites. The fragments were cloned into p2NIL and the <i>PacI</i> cassette from pGOAL17 was inserted; Km<sup>r</sup>.</p> | This work   |
| pSE100                     | <p>Derivative of pMS2 containing Pmyc1tetO carrying a <i>hyg</i> gene; Hyg<sup>r</sup>. pMS2 is a shuttle vector containing origins of replication for <i>Escherichia coli</i> (pMB1) and mycobacteria (pAL500) and a multiple cloning site flanked by two transcriptional terminators.</p>                                                                                                                                                                                                                                                                                                                 | Sabine Erht |
| pMC1s                      | <p>Derivative of pMV306K, which is a single-copy-integrating plasmid which inserts into L5 attB; Km<sup>r</sup>. Anhydrotetracycline-responsive repressor (tetR) is not codon-usage adapted for mycobacteria but is expressed from a strong mycobacterial promoter (psmyc = puv15).</p>                                                                                                                                                                                                                                                                                                                     | Sabine Ehrh |
| pTEK-4S0X                  | <p>Kanamycin resistant derivative of pTE-4S0X; Km<sup>r</sup>. Anhydrotetracycline-responsive repressor (revtetR) is expressed from a strong mycobacterial promoter (psmyc = puv15). High-copy number in <i>E. coli</i> and low-copy number in mycobacteria.</p>                                                                                                                                                                                                                                                                                                                                            | Sabine Ehrh |
| pS <i>dacB</i>             | <p>Derivative of pSE100. Suicide construct from which the mycobacterial ori was excised and the native promoter (15 bp upstream start codon) and 350 bp of the 5' region of <i>dacB</i> cloned directly downstream of the Pmyc1tetO using <i>SphI</i> and <i>MscI</i>; Hyg<sup>r</sup>.</p>                                                                                                                                                                                                                                                                                                                 | This work   |

---

**Table S2.** Primers used to generate suicide plasmids for MSMEG\_6113 (*dacB*), MSMEG\_2432, MSMEG\_2433 and MSMEG\_1661.

| Region amplified                                | Primer name | Sequence (5' – 3') <sup>a</sup>                    | Description of amplicon                              | Mutation                                      |
|-------------------------------------------------|-------------|----------------------------------------------------|------------------------------------------------------|-----------------------------------------------|
| Msmeg_6113 ( <i>dacB</i> )<br>upstream region   | dacB_UF     | 5' – CGCG <u>AAGCTT</u> GCGAGCCCCTGGTGAACC         | 1200 bp of upstream and 21                           |                                               |
|                                                 | dacB_UR     | 5' – CGCG <u>GCGGCCGCGCG</u> CGTCAGCCTATCGCTCAT    | bp of the 5'-end of<br>Msmeg_6113 ( <i>dacB</i> )    | 1400 bp unmarked                              |
| Msmeg_6113 ( <i>dacB</i> )<br>downstream region | dacB_DF     | 5' – CGCG <u>GCGGCCGCGCC</u> AGCTGCGGATGCGGCGCATGA | 1339 bp of downstream and                            | deletion in <i>dacB</i>                       |
|                                                 | dacB_DR     | 5' – CGCG <u>GGTACC</u> ATCTCGGCGCCAACACAT         | 22 bp of the 3'-end of<br>Msmeg_6113 ( <i>dacB</i> ) |                                               |
| Msmeg_1661<br>upstream region                   | 1661_UF     | 5' – CGCG <u>AAGCTT</u> GCGAGGCCGTCGAGAGCG         | 1200 bp of upstream and 18                           | 1158 bp unmarked<br>deletion in<br>Msmeg_1661 |
|                                                 | 1661_UR     | 5' – CGCG <u>CATATGC</u> ACCGCGCGTCGCGTCAT         | bp of the 5'-end of<br>Msmeg_1661                    |                                               |
| Msmeg_1661<br>downstream region                 | 1661_DF     | 5' – CGCG <u>CATATGC</u> AGCGCCCGCAGCACTGA         | 1375 bp of downstream and                            | 18 bp of the 3'-end of<br>Msmeg_1661          |
|                                                 | 1661_DR     | 5' – CGCG <u>GGTACC</u> ATTTCGGGTTGTCGCGGTT        |                                                      |                                               |
| Msmeg_2432<br>upstream region                   | 2432_UF     | 5' – CGCG <u>AAGCTT</u> CCGGGAACGCAGGCAGC          | 1200 bp of upstream and 21                           | 786 bp unmarked<br>deletion in<br>Msmeg_2432  |
|                                                 | 2432_UR     | 5' – CGCG <u>CATATGC</u> CGCCGCGAACAGTCTTCGCAC     | bp of the 5'-end of<br>Msmeg_2432                    |                                               |
| Msmeg_2432<br>downstream region                 | 2432_DF     | 5' – CGCG <u>CATATGG</u> ACTACGGCTTCAGCCAGTAG      | 1200 bp of downstream and                            | 18 bp of the 3'-end of<br>Msmeg_2432          |
|                                                 | 2432_DR     | 5' – CGCG <u>GGTACC</u> GGCCGACTTCGACCTGTCTG       |                                                      |                                               |
| Msmeg_2433<br>upstream region                   | 2433_UF     | 5' – CGCG <u>AAGCTT</u> ACGATCCC GCGGACCAGG        | 1200 bp of upstream and 21                           | 870 bp unmarked<br>deletion in<br>Msmeg_2433  |
|                                                 | 2433_UR     | 5' – CGCG <u>CATATGC</u> CCGAAGGCGTACCTCCACAT      | bp of the 5'-end of<br>Msmeg_2433                    |                                               |
| Msmeg_2433<br>downstream region                 | 2433_DF     | 5' – CGCG <u>CATATGG</u> CGAGCATCGGGGCGCTCTGA      | 1200 bp of downstream and                            | 21 bp of the 3'-end of<br>Msmeg_2433          |
|                                                 | 2433_DR     | 5' – CGCG <u>GGTACC</u> ATCGGCCACGGCCGCATC         |                                                      |                                               |

a. Restriction sites are underlined.

**Table S3.** Primers used for gene expression analysis by qPCR.

| <b>Gene</b>                | <b>Primer name</b> | <b>Sequence (5' – 3')</b>  | <b>Amplicon size (bp)</b>   |
|----------------------------|--------------------|----------------------------|-----------------------------|
| Msmeg_6113 ( <i>dacB</i> ) | <i>dacB</i> _qF    | 5' – AACGAGTCGGACAACGTGAT  | Positions 934-1140 (207 bp) |
|                            | <i>dacB</i> _qR    | 5' – GACCACCTCATCGAGGGTAA  |                             |
| Msmeg_1661                 | 1661_qF            | 5' – CCACACCCAGAGCTACCAGT  | Positions 732-924 (193 bp)  |
|                            | 1661_qR            | 5' – GGTTCCCTTGAGCAACACC   |                             |
| Msmeg_1900                 | 1900_qF            | 5' – GACAACGCGGTTTCAGACCTA | Positions 313-491 (179 bp)  |
|                            | 1900_qR            | 5' – CAGGATTCGTTGGCGTAGAT  |                             |
| Msmeg_2432                 | 2432_qF            | 5' – GCTGAACTATCCGGTGATCG  | Positions 567-768 (202 bp)  |
|                            | 2432_qR            | 5' – GTACATCTGCACCACCACCA  |                             |
| Msmeg_2433                 | 2433_qF            | 5' – GCTGGTCAACCAGAACGAGT  | Positions 651-803 (153 bp)  |
|                            | 2433_qR            | 5' – TCTTTCACCAGGCCGTACAT  |                             |

**Table S4.** Primers used for genotyping *M. smegmatis* mutant strains. Primers F and R2 situated 100 bp upstream and downstream of start and stop codons, respectively. Primer R1 approximately in the middle of gene targeted for deletion.

| <b>Gene</b>                | <b>Primer name</b> | <b>Sequence (5' – 3')</b> | <b>Amplicon sizes (bp)</b>                             |
|----------------------------|--------------------|---------------------------|--------------------------------------------------------|
| Msmeg_6113 ( <i>dacB</i> ) | KO <i>dacB</i> _F  | 5' – ACGACGTCGAACTCCACC   | FR1 = 800 bp (wild-type)                               |
|                            | KO <i>dacB</i> _R1 | 5' – CGTCGATGTCTGGCCGGGTC | FR1 = absent ( $\Delta$ )                              |
|                            | KO <i>dacB</i> _R2 | 5' – ATGGCCTGGCGGCGCGTG   | FR2 = 1643 bp (wild-type)<br>FR2 = 242 bp ( $\Delta$ ) |
| Msmeg_1661                 | KO1661_F           | 5' – CACACGAGTCACAACCTGT  | FR1 = 701 bp (wild-type)                               |
|                            | KO1661_R1          | 5' – TGGCGGCCAGCGTGTTGA   | FR1 = absent ( $\Delta$ )                              |
|                            | KO1661_R2          | 5' – CGGCATGGTGAACCAGTC   | FR2 = 1394 bp (wild-type)<br>FR2 = 236 bp ( $\Delta$ ) |
| Msmeg_2432                 | KO2432_F           | 5' – GGACCGTTCGGCGAGCAT   | FR1 = 500 bp (wild-type)                               |
|                            | KO2432_R1          | 5' – TGTCGGCGAGCATGTTGG   | FR1 = absent ( $\Delta$ )                              |
|                            | KO2432_R2          | 5' – CGGATCTGGTGATCCTGC   | FR2 = 1028 bp (wild-type)<br>FR2 = 242 bp ( $\Delta$ ) |
| Msmeg_2433                 | KO2433_F           | 5' – GCAGTCGAATAGTCCACC   | FR1 = 500 bp (wild-type)                               |
|                            | KO2433_R1          | 5' – CCGCGTTCGTTGCCCGACG  | FR1 = absent ( $\Delta$ )                              |
|                            | KO2433_R2          | 5' – AGTGCCGTGCTGAGGGCG   | FR2 = 1028 bp (wild-type)<br>FR2 = 242 bp ( $\Delta$ ) |

**Table S5.** Primers used to amplify Msmeg\_6113 (*dacB*) for complementation and for construction and confirmation of merodiploid strain in *M. smegmatis*.

| Gene                           | Primer name          | Sequence (5' – 3') <sup>a</sup>              | Description                                                                                                                        | Amplicon size (bp) |
|--------------------------------|----------------------|----------------------------------------------|------------------------------------------------------------------------------------------------------------------------------------|--------------------|
| MSMEG_6113<br>( <i>dacB</i> )  | Comp_ <i>dacB</i> _F | 5'–GCGC <u>ACGCGT</u> TCTCGTGATCCACCTCGT–3'  | 150 bp upstream of 5'–end amplified with full-length <i>dacB</i> to maintain native promoter sequences (-10 and -35)               | 1593 bp            |
|                                | Comp_ <i>dacB</i> _R | 5'–GCGC <u>CTGCAGT</u> CATGCGCCGCATCCGCA–3'  |                                                                                                                                    |                    |
| MSMEG_1661                     | Comp_1661_F          | 5'–GCGC <u>ACGCGT</u> GAGAAGTTCGAGTAACGC–3'  | 150 bp upstream of 5'–end amplified with full-length MSMEG_1661 to maintain native promoter sequences (-10 and -35)                | 1364 bp            |
|                                | Comp_1661_R          | 5'–GCGC <u>ACGCGT</u> TTCAGTGCTGCGGGCGCTG–3' |                                                                                                                                    |                    |
| MSMEG_2432                     | Comp_2432_F          | 5'–GCGC <u>AAGCTT</u> CGTCCGGGGTGAACACCG–3'  | 150 bp upstream of 5'–end amplified with full-length MSMEG_2432 and MSMEG_2433 to maintain native promoter sequences (-10 and -35) | 1958 bp            |
|                                | Comp_2432_R          | 5'–GCGC <u>AAGCTT</u> CTACTGGCTGAAGCCGTA–3'  |                                                                                                                                    |                    |
| MSMEG_2433                     | Comp_2433_F          | 5'–GCGC <u>AAGCTT</u> CGTCCGGGGTGAACACCG–3'  | 150 bp upstream of 5'–end amplified with full-length MSMEG_2433 to maintain native promoter sequences (-10 and -35)                | 1061 bp            |
|                                | Comp_2433_R          | 5'–GCGC <u>AAGCTT</u> TCAGAGCGCCCCGATGCT–3'  |                                                                                                                                    |                    |
| <i>attB</i> (tRNA for glycine) | attL2_F              | 5' – CTT GGA TCC TCC CGC TGC GC – 3'         | Site for integration of the complementation vector pMV <i>dacB</i> in the bacterial chromosome                                     | 282 bp             |
|                                | attBS1_R             | 5' – ACG TGG CGG TCC CTA CCG – 3'            |                                                                                                                                    |                    |
|                                | attBS2_F             | 5' – ACA GGA TTT GAA CCT GCG GC – 3'         |                                                                                                                                    | 320 bp             |
|                                | attL4_R              | 5' – AAT TCT TGC AGA CCC CTG GA – 3'         |                                                                                                                                    |                    |

a. Restriction sites are underlined.



**Table S6.** Primers used to generate suicide plasmid for use in constructing Msmeg\_6113 (*dacB*) promoter replacement strain in *M. smegmatis*.

| <b>Gene</b>                   | <b>Primer name</b> | <b>Sequence (5' – 3')<sup>a</sup></b>           | <b>Description</b>                                                       | <b>Amplicon size (bp)</b> |
|-------------------------------|--------------------|-------------------------------------------------|--------------------------------------------------------------------------|---------------------------|
| Msmeg_6113<br>( <i>dacB</i> ) | KD_ <i>dacB</i> _F | 5' – GCGCATG <u>CCCGGG</u> CCAACCTTAGATGAGCGATA | 15 bp upstream of<br>start codon and 350                                 | 393 bp                    |
|                               | KD_ <i>dacB</i> _R | 5' – GCG <u>CCCCGGG</u> CCCGTGTCGGCGTCGGTG      | bp of 5'–end<br>harbouring putative<br>native promoter (-10)<br>sequence |                           |

a. Restriction sites are underlined and start codons are indicated in bold.

## Supplementary Figures

```

Mtb_dacB1 -----MAFLRSVSCLAAAVFAVGTGIGLPTAAGEPNAAPA
Mtb_dacB2 -----
Mtb_Rv3627c -----MGPTRWR-KSTHVVVGAAVLAFVAVVVAAAALVTTG----
MSMEG_dacB MSDRLTRRGGSPRSIESRGSMPRTRWR-RSTHVAVGVAVLALVVAVVAAAALF-TG----
MSMEG_2432 -----
MSMEG_2433 -----
MSMEG_1661 -----MT-RAVTAVGALALLTAPLMTAGVAGAEPG---V
MSMEG_1900 -----
E.coli_dacA -----
E.coli_dacB -----
E.coli_dacC_PBP6 -----
E.coli_dacD_PBP6b -----

```

```

Mtb_dacB1 ACPYKVSTP--PAVDSSEVPAAGE-P-PLPLVVPPTPVGGNALGGCGIITA--PGSAPAP
Mtb_dacB2 MRKLMATA--ALCACA VTSAGA-----AWADADVQ PAGSVPI--PDGP---
Mtb_Rv3627c GHRAGVRAP--APPBRPPTVKAGV-----VPVADTAATPSAAGVTAA--LAVVAAD
MSMEG_dacB KHSDAAEAV--PPAPPPATADPGV-----VPVDLSAPTPTRRGLATA--LAAALAN
MSMEG_2432 MRRLFAAAA--FALSTALAAATFT-----PVAHAEPAAAPAGAAV--TDGP---
MSMEG_2433 MWRYAFGLV--VLVVSGLITGPGSLA-----VPVARADADIQVGSVAP--PEGP---
MSMEG_1661 DCPYRETPP--PAVDASEVPKPGE--AAPGPLPVPPKAIGGEALSGCGVITA--PNTPPVP
MSMEG_1900 -----
E.coli_dacA -----MNTIF SARIMKRLALTAL-----CTAFISA AHADDLNIKTMI PGVP---
E.coli_dacB -----MRF SRFI IGLTSC-----IAFSVQAANVDEYITQ-LPAGA---
E.coli_dacC_PBP6 -----MTQY--SSLLRGLAAGSAF-----LFLFAPTAFAAEQTVEA-----P---
E.coli_dacD_PBP6b -----MKRRLIIAASL-----FVFNLSGFAAENIPFS--PQPP---

```

```

Mtb_dacB1 GDVSAEAWLVADLD SGAVIAARDPHGRHR PASVIKVLVAMASINTLTLNKS-----
Mtb_dacB2 ----AQTWIVADLD SGQVLGRDQNVAH PAS TKVLLALVALDEL DLNSTV-----
Mtb_Rv3627c PDLGKLAGRITDAL TGQELWQRLLDDVPLV PAS TNKIL TAAAALL TDRQARISTRVVAGG
MSMEG_dacB PDLGLITGRITDADTGAELWEQGARVPMQ PAS VNKVLT TAAAALL TDRDARLT TTVAAD
MSMEG_2432 ----AKAWLVADMDTGRVLASKDPYGSYAP AS TIKPLLAMVVDLHLRPNFA-----
MSMEG_2433 ----AETWVADMDT GQILAGRGEYVRHAP AS TIKLLALVVLDEVPLDSTI-----
MSMEG_1661 EDVSAEAWIVADMDTGDVIAARDPHGRHR PAS I IKVLTATAALNELNLNKR-----
MSMEG_1900 -----
E.coli_dacA -QIDAESYILIDYNSGKVLAEQNADVRRD PAS LTKM MTSYVIGQAMKAGKFK-----
E.coli_dacB ----NLALMVQKVGASAPAI DYHSQQMAL PAS TQKVI TALAALIQLGPDFRF-TTTLETK
E.coli_dacC_PBP6 -SVDARAWILMDYASGKVLAEAGNADEKLD PAS LTKIMTSYVVGQALKADKIK-----
E.coli_dacD_PBP6b -EIHAGSWVLM DYTTGQILTAGNEHQORN PAS LTKIMTGYVVDRAIDSHRIT-----

```

```

Mtb_dacB1 -----AGTADDAAVEG TKVGVNT--G---GTYTVN
Mtb_dacB2 -----VADVADTQAE CNVGVKP--G---RSYTAR
Mtb_Rv3627c QNPQGPVVLV GADPTLSAAPPQD TWYHGAARIGDLVEQIRRSVTP--T---AVQVDA
MSMEG_dacB DQP-GLVVLRGGDTTLSAAPKGTDTWYKGAARISDLADQVRARGIRV--T---RVRVDT
MSMEG_2432 -----RANASHTKVECS CVGLKP--G---QPYTTR
MSMEG_2433 -----VADETDTDVECN CAGVAP--G---RTYTAR
MSMEG_1661 -----AGTQDDANAEGTRVGVGP--G---GQYTIN
MSMEG_1900 -----MGLGA--GLFGGLVTAS
E.coli_dacA -----ETDLVTIGNDAW----ATGNPVFKGSSLMFLKP--G---MQVPVS
E.coli_dacB GNV-ENGVLKGD L-----VARFGADPTLK-RQDIRNMVATLKKSGVNQIDG---NVLIDT
E.coli_dacC_PBP6 -----LTD MVTVGKDAW----ATGNPALRGSSVMFLKP--G---DQVSVA
E.coli_dacD_PBP6b -----PDDIVTVGRDAW----AKDNPV FVGSSLMFLKE--G---DRVSVR

```

```

Mtb_dacB1 QLLHGLLMH SC-----N DAAYALARQLG--GMPAALEKINLLAAKLGGRDT--RVAT
Mtb_dacB2 QLLDGLLLV SC-----N DAANTLAHMLG--GQDVTVAKMNAKALRGATST--HATT
Mtb_Rv3627c SAFSGPTMAPGWD PADIDNG DIAPIEAAMID--AGRIQPTTVNSRRSRTPALDAGRELAK
MSMEG_dacB SAYSGPTMAPGWD PADIDGG DIAPMESVMLD--GGRTQPTTVESRRSRTSPALDAGKALAA
MSMEG_2432 QLLDALLMV SC-----N DAANMLADMLG--GPRVAVAA MNRKAAA VGARNT--RAAS
MSMEG_2433 QLEEAALLA SC-----N DAANTLARMLG--GPEAAVAKMNAKAAQLGARDT--NVVT
MSMEG_1661 DLLHGLLMY SC-----N DAAHALAMQLG--GWDPALQKLN TLAAKLGGRDT--RAAT
MSMEG_1900 AVLTGALTAPA -PSPQIAIV ONTEALTSSDGS LADGQAFSPFDLQQPAIAKLDP--RLLA
E.coli_dacA QLIRGINLQ SC-----N DACVAMADFAAG-SQDAFVGLMNSYVNALGLKNT--HFQT
E.coli_dacB SIFASHDKAPGWPW-----N DMTQCF-----SAPPAAAIVDRNCF SVSLSA-----
E.coli_dacC_PBP6 DLNKGVIIQ SC-----N DACIALADYVAG-SQESFIGLMNGYAKKLGLTNT--TFQT
E.coli_dacD_PBP6b DLSRGLIVD SC-----N DACVALADYIAG-GQRQFVEMMN NYAEKLHLKDT--HFET

```

Mtb\_dacB1 PSGLDGPMS--TSAYDIGLFYRYAWQN-PV---FADIVATRTRFDFFPGHGDHPGYELENQ  
Mtb\_dacB2 PSGLDGPMSGASTAHDLVVIFRAAMAN-PV---FAQITAEPSAMFPS--DNQEQLIVNQ  
Mtb\_Rv3627c ALGLDPAAVTI-ASAPAGARQLAVVQSA-PLIQRLSQMMN<sup>SDN</sup>VMA---ECIGREVAVA  
MSMEG\_dacB ALGVEPESVTLMPSGMRGGTTIAEVQSA-PLIERLRQMMN<sup>SDN</sup>VMA---ESIAREVAEA  
MSMEG\_2432 PSGLDGPWESLTPHDLAVIFRAALNY-PV---IAQILRQTTAQFPG--KT----LTYQ  
MSMEG\_2433 PSGLDAPGMPFWSTPHDLAVIFRAAMAD-PV---FAQITAMPSTVFPA--KTGDRVLVNQ  
MSMEG\_1661 PSGLDGPMS--TSAYDIALFYRYAWQN-PV---FADIVHTQSYQFPGR-DGGSYPIEND  
MSMEG\_1900 AVQNAANA----AAAEGITMTVTSGWRS-PA---FQOTLLDNVQTYGS-LAAAREYVQT  
*E. coli*\_dacA VHGLDADGQY--SSARDMALIGQALIRDVPN---EYSIYKEKEFTFNG-----IRQLNR  
*E. coli*\_dacB -----PKPGDMAFIRVASYY--PV-TMFSQVRTLPRGSAEA--QYCELDVVP  
*E. coli*\_dacC\_PBP6 VHGLDAPGQF--STARDMALLGKALIHVPE---EYAIHKEKEFTFNK-----IRQPNR  
*E. coli*\_dacD\_PBP6b VHGLDAPGQH--SSAYDLAVLSRAIIHGEPE---FYHMYSEKSLTWNG-----ITQQRN

Mtb\_dacB1 NQLLYNYPG---ALGG-----KTGYTDDAGQTFVGAANRD-GRRLLMTVLLHGTRQPIPP-  
Mtb\_dacB2 DELLQRYPG---AIGG-----KTGYTNAARKTFVGAARG-GRRLVIAMMYGLVKEGGPT  
Mtb\_Rv3627c INRPQSFSG---AVDAVTSRLNTA<sup>KTG</sup>HIDTAGAALVDSSGLSLDNRLTARTLDATMQAAAGP  
MSMEG\_dacB LGRPQSFEG---AVGAVLTQLRSV<sup>KTG</sup>GIDTSGAKLVDSSGLSVDNRLTALTLDDEVNAAAAGH  
MSMEG\_2432 NELLTRYPG---DIGG-----KTGYTNLARKTYVGAARG-NRRLVVVQMYG-----TGD  
MSMEG\_2433 NELLHRYPG---TLGG-----KTGYT<sup>KTG</sup>TDIARKTFVAAAQRD-GRRLVIAMMYGLVKEGGPT  
MSMEG\_1661 NKLLANYPG---ALGG-----KTGYTDDAGQTFVGAARD-GRRLIAVLLKGRVPIAP-  
MSMEG\_1900 PTASRHVTGEAVDIGG-----TGADQWLITN-----GPRFGLCQIYANE-----  
*E. coli*\_dacA NGLLWDNSL---NVDG---IK<sup>KTG</sup>HTDKAGYNLVASATEG-QMRLISAVMGGRTFKGR---  
*E. coli*\_dacB DLNRFTLTG---CLPQRSEPLPLA<sup>KTG</sup>FAVQDGASYAGAILKD-ELKQAGITWSGTLRQTQ-  
*E. coli*\_dacC\_PBP6 NRLLWSSNL---NVDG---M<sup>KTG</sup>TTAGAGYNLVASATQG-DMRLISVVLGAKTDRIIR--  
*E. coli*\_dacD\_PBP6b NGLLWDKTM---NVDG---L<sup>KTG</sup>HTSGAGFNLIASAVDG-QRRLIAVVMGADSAKGR--

Mtb\_dacB1 -WEQAAHLLDYGFNTPAGTQIGTLIEPDPMSLMDTRNPADRQRVDP-QAAARISAADALP  
Mtb\_dacB2 YWDQAATLFDWGFALNPQASVGSL-----  
Mtb\_Rv3627c DQPALRPLLDL---LPIAGGSGTL---GERFLDAATDQGPAGWLR--KTGSLTAINSL-  
MSMEG\_dacB TQPALRPLVDL---LPIAGGSGTL---SNRYLDTDAGRAAAGWLR--KTGSLTGTNAL-  
MSMEG\_2432 LYDQAIRLFDYGFSG-----  
MSMEG\_2433 YWDQAAGLLDWGFAQDRSASIGAL-----  
MSMEG\_1661 -WEQAARLLDYGFATPPGKVTGLVDPDPSL-----APKQAEESPQAASVLPADAMP  
MSMEG\_1900 -----SWHFEL-VADPLGNC-----PLLLPDAAG-----  
*E. coli*\_dacA -EAESKLLTWGFRF-----FETV-----NPLKVGKEFASEPVWFGD-SDRASLGVDKDV-  
*E. coli*\_dacB -VNEPGTVVASKQSAPLHDLKIM-----LKKSDNMIADTVFRMI--GHARFNVPGTW-  
*E. coli*\_dacC\_PBP6 -FNESEKLLTWGFRF-----FETV-----TPIKPDATFVTQRVWFGD-KSEVNLGAGEAG-  
*E. coli*\_dacD\_PBP6b -EEEARKLLRWGQQN-----FTTV-----QILHRGKKGVTERIWIYGD-KENIDLGTQEFE-

Mtb\_dacB1 VRVGVAVIGALIVFGLIMVARAMNRRPQH-----  
Mtb\_dacB2 -----  
Mtb\_Rv3627c VGVLTDRSGRVLTFALISNEAGPNRNAMDALATKLWFCGCTT-----  
MSMEG\_dacB AGIVTDRSGRVLTFALISNNA<sup>KTG</sup>PTGR<sup>KTG</sup>TAIDALAAVLRSCGCGA-----  
MSMEG\_2432 -----  
MSMEG\_2433 -----  
MSMEG\_1661 VRVGVAVVGAIIVFMLILGARQLNQRPH-----  
MSMEG\_1900 -----  
*E. coli*\_dacA -----YLTIPRGRMKDLKASY-----VLNSSELHAPLQKNQVVG  
*E. coli*\_dacB -----RAGSDAVRQILRQAGVDIGNTI-----IADGSL---SRHNLIAPATMMQVQLQ  
*E. coli*\_dacC\_PBP6 -----SVTIPRQQLKLNKASY-----TLTEPQLTAPLKKGQVVG  
*E. coli*\_dacD\_PBP6b -----WMVLPKAEIPHIKAKY-----TLDGKELTAPISAHQRVG

Mtb\_dacB1 -----  
Mtb\_dacB2 -----  
Mtb\_Rv3627c -----  
MSMEG\_dacB -----  
MSMEG\_2432 -----  
MSMEG\_2433 -----  
MSMEG\_1661 -----  
MSMEG\_1900 -----  
*E. coli*\_dacA TINFQLDGKTIEQRPLVVLQEIPEGNFFGKIIDYIKLMFHHWFG-----  
*E. coli*\_dacB YIAQHDNE-----LNFI SMLPLAGYDGSL-QY-RAGLHQ-----AGVDGKVS<sup>KTG</sup>AKTGS  
*E. coli*\_dacC\_PBP6 TIDFQLNGKSIEQRPLIVMENVEEGGFGRVWDFVMMKFHQWFGSWFS-----  
*E. coli*\_dacD\_PBP6b EIELYDRDKQVAHWPLVTTLESVGE<sup>KTG</sup>SMFSRLSDY----FHHKA-----

Mtb\_dacB1 -----  
Mtb\_dacB2 -----

```

Mtb_Rv3627c -----
MSMEG_dacB -----
MSMEG_2432 -----
MSMEG_2433 -----
MSMEG_1661 -----
MSMEG_1900 -----
E. coli_dacA -----
E. coli_dacB LQGVYNLAGFITTASGQRMAFVQYLSGYAVEPADQRNRRRIPLVRFESRLYKDIYQNN
E. coli_dacC_PBP6 -----
E. coli_dacD_PBP6b -----

```

**Figure S1A.** Multiple sequence alignments for DD-CPase homologues. Shown are the DD-CPase homologues from *E. coli*, *M. tuberculosis* (Mtb) and *M. smegmatis* (MSMEG). The alignment was generated using Kalign (<http://www.ebi.ac.uk/Tools/msa/kalign/>). Conserved domains are highlighted in yellow (100% homologous) and turquoise ( $\geq 75\%$  homologous). The conserved Ser-Xaa-Xaa-Lys (SxxK), Ser-Xaa-Asn (SxN) and Lys-Thr-Gly (KTG) domains are shown in red boxes.

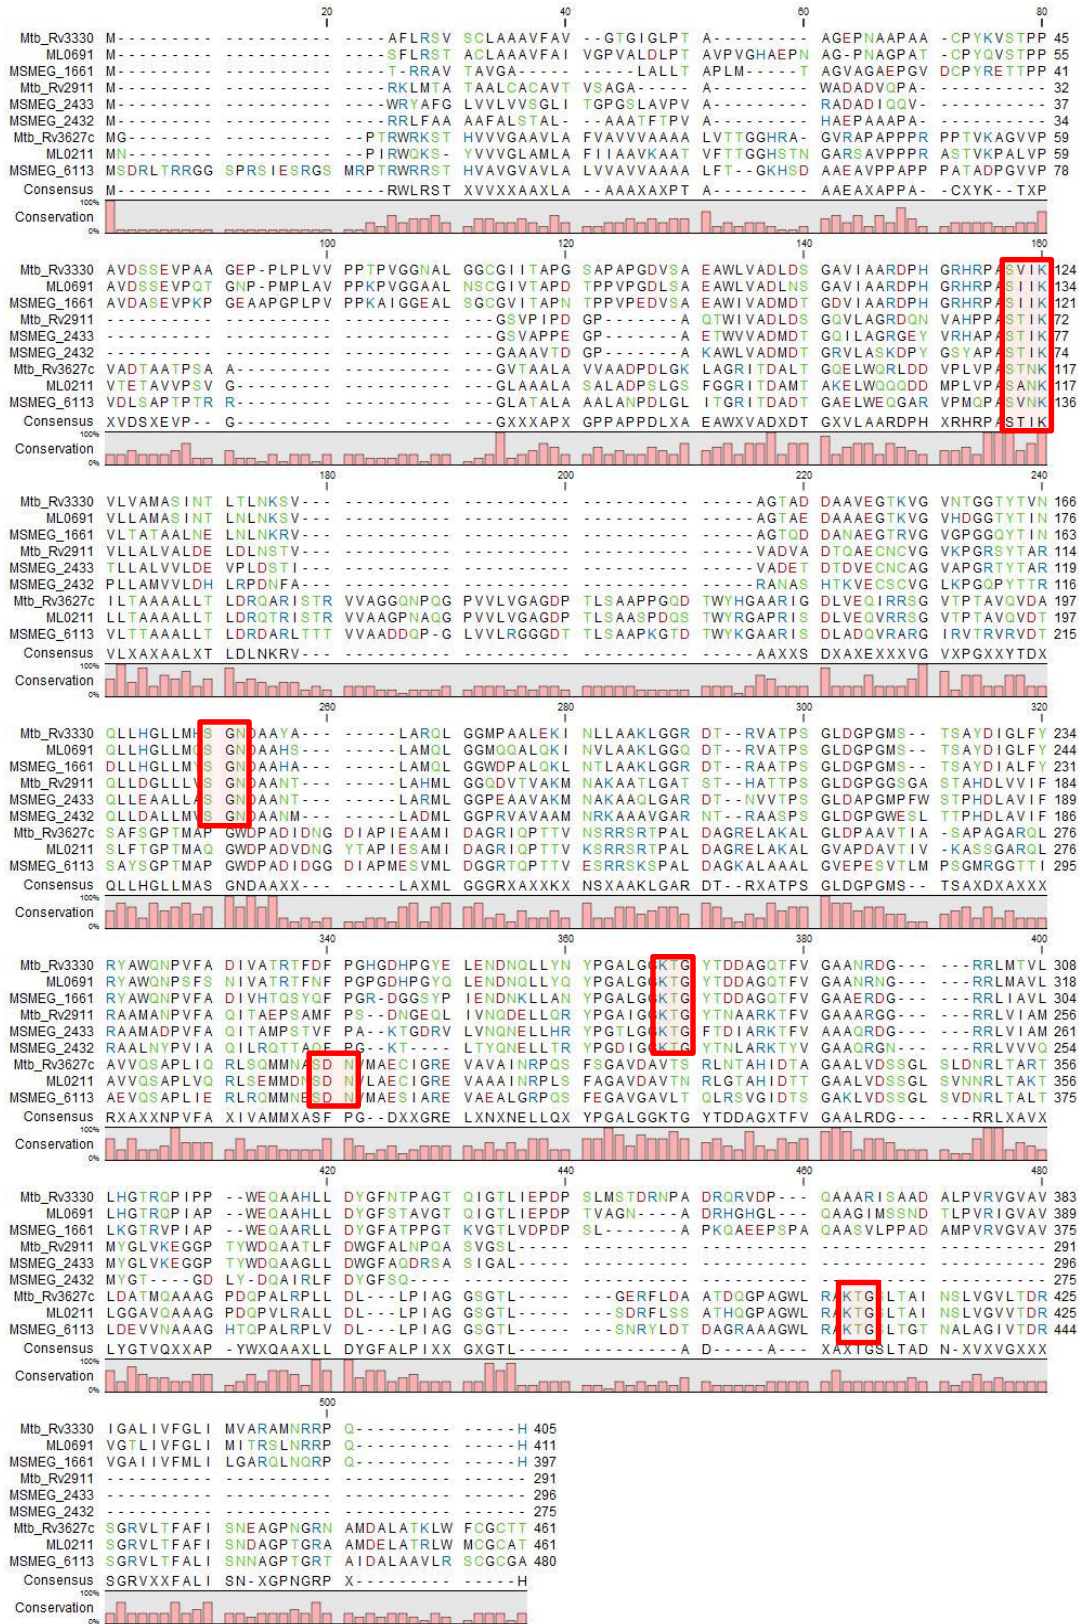

**Figure S1B. Multiple sequence alignments for mycobacterial DD-CPase homologues.** Shown are the DD-CPase homologues from *M. tuberculosis* (Mtb), *M. smegmatis* (MSMEG) and *M. leprae* (ML). The alignment was generated using CLC sequence viewer (Version 7.8). Conserved domains are highlighted in red boxes and correspond to the SxxK, SxN and KTG motifs required for DD-CPase activity.

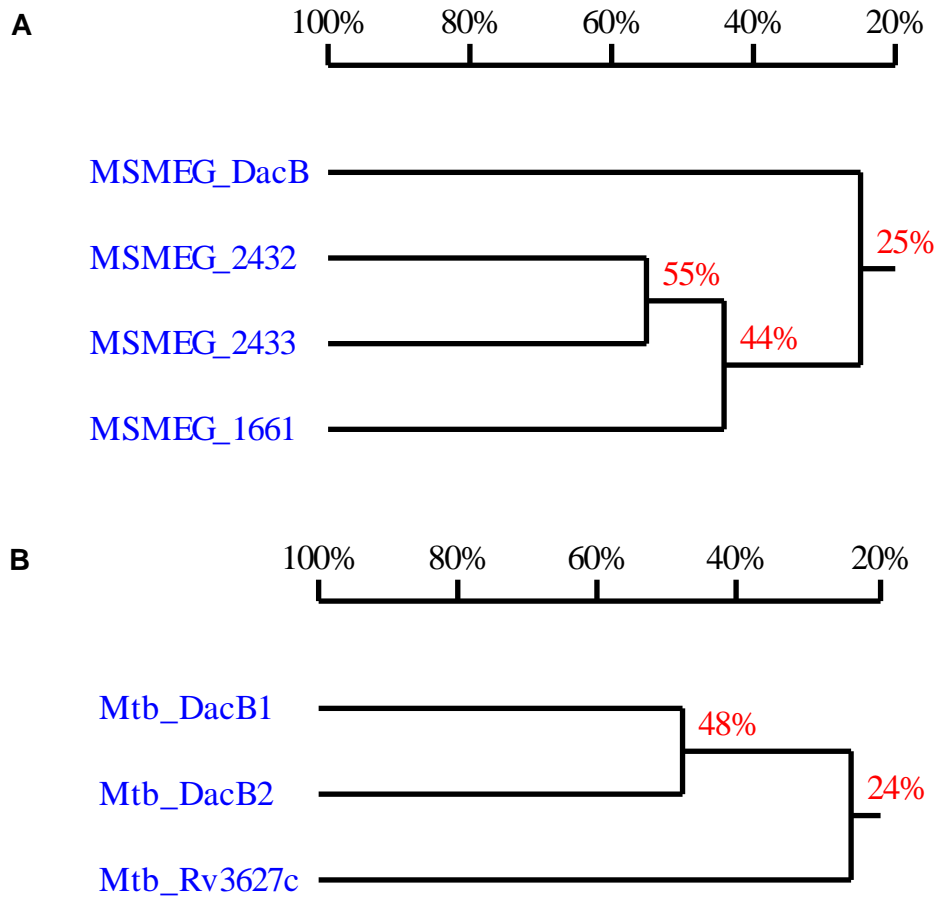

**Figure S2. Homology trees for mycobacterial DD-CPase homologues.** (A) Homology between four *M. smegmatis* mc2155 homologues. (B) Homology between three *M. tuberculosis* H37Rv homologues. In both cases, one homologue is located on a distinct branch in the phylogenetic tree (MSMEG\_DacB and Rv3627c). Trees were compiled using DNAMAN software (version 4.13; Lynnon Biosoft).

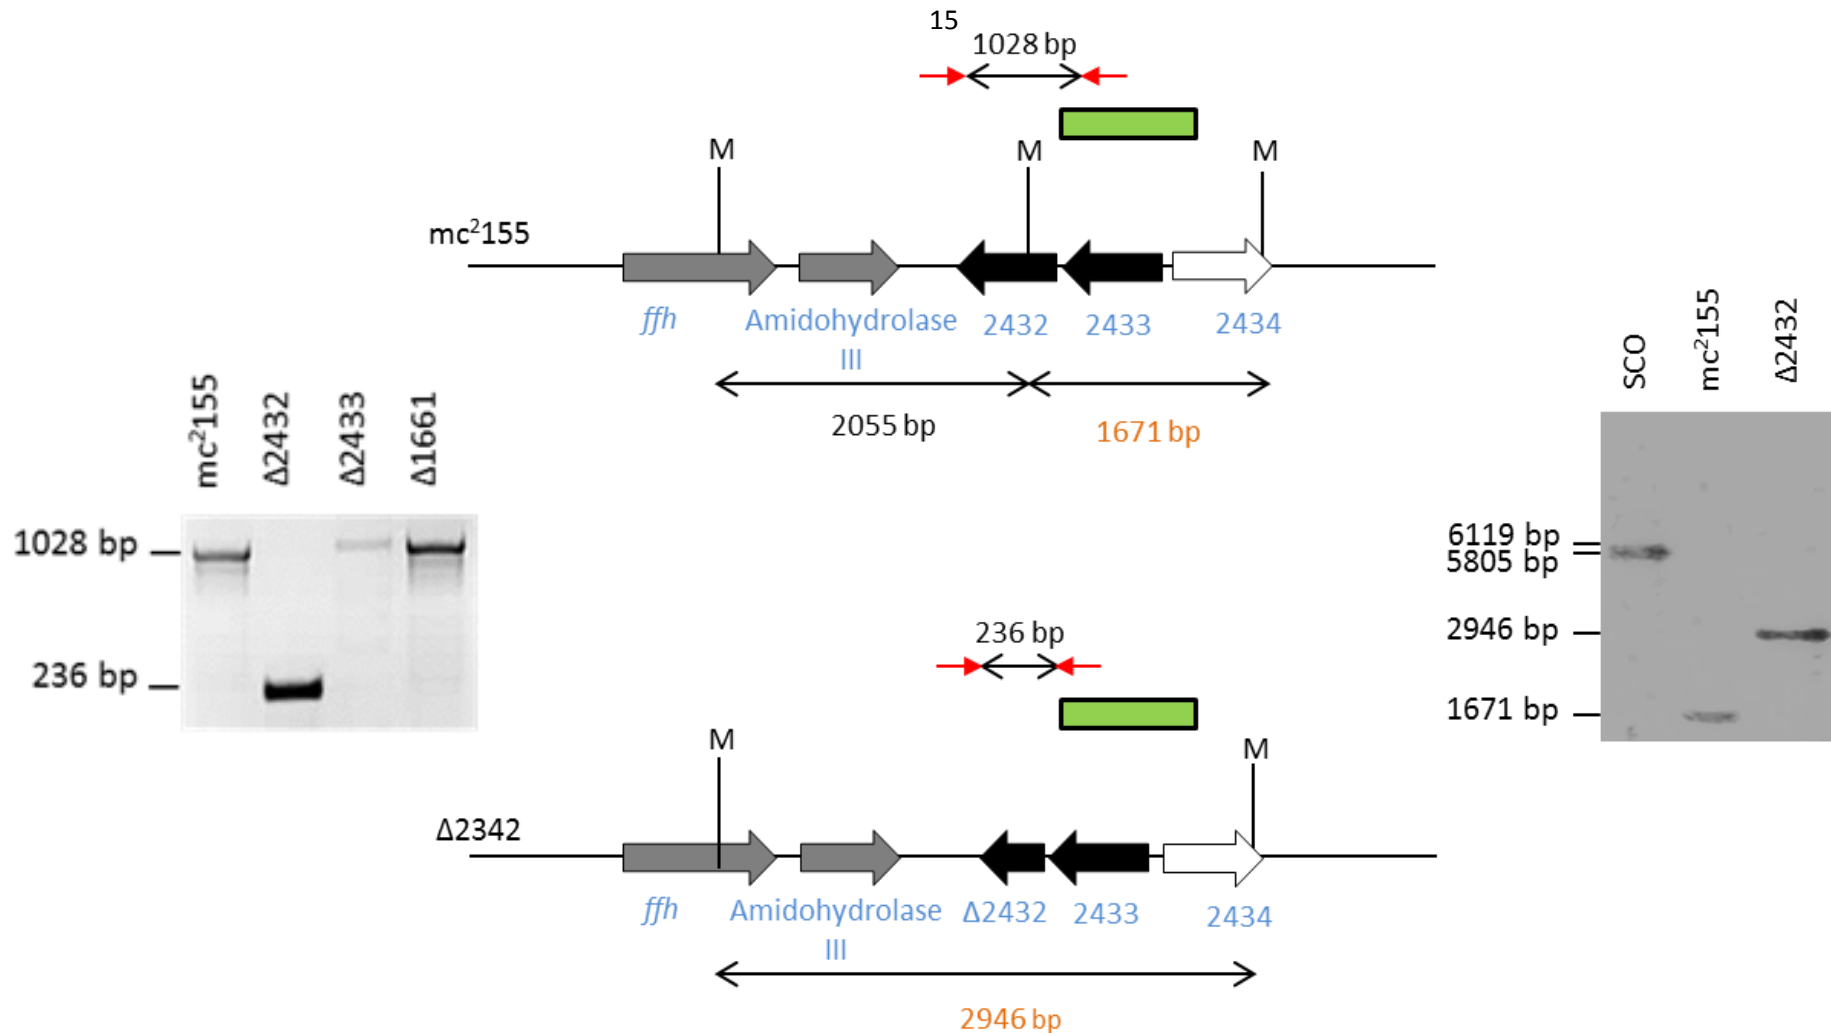

**Figure S3A. Genotypic characterization of the MSMEG\_2432 deletion mutant by PCR and Southern blot analysis.** The genomic map of the relevant locus is shown for the wild-type and mutant strain. Also shown on the left is the PCR confirmation of the genotype and Southern Blotting is shown on the right. For PCR confirmation, chromosomal DNA was used to amplify the MSMEG\_2432 alleles from the wild-type and mutant strains using the primer pairs described in Table S4 and indicated as red arrows above. The expected sizes of the amplicons are as follows: MSMEG\_2432, 1028 bp and Δ2432, 236 bp. For the Southern blot analysis chromosomal DNA from the SCO, parental and mutant strain was digested with *Mlu*I [M]. The probe used for hybridization is shown as a solid green box and the expected sizes are indicated with orange text. The figures are not drawn to scale.

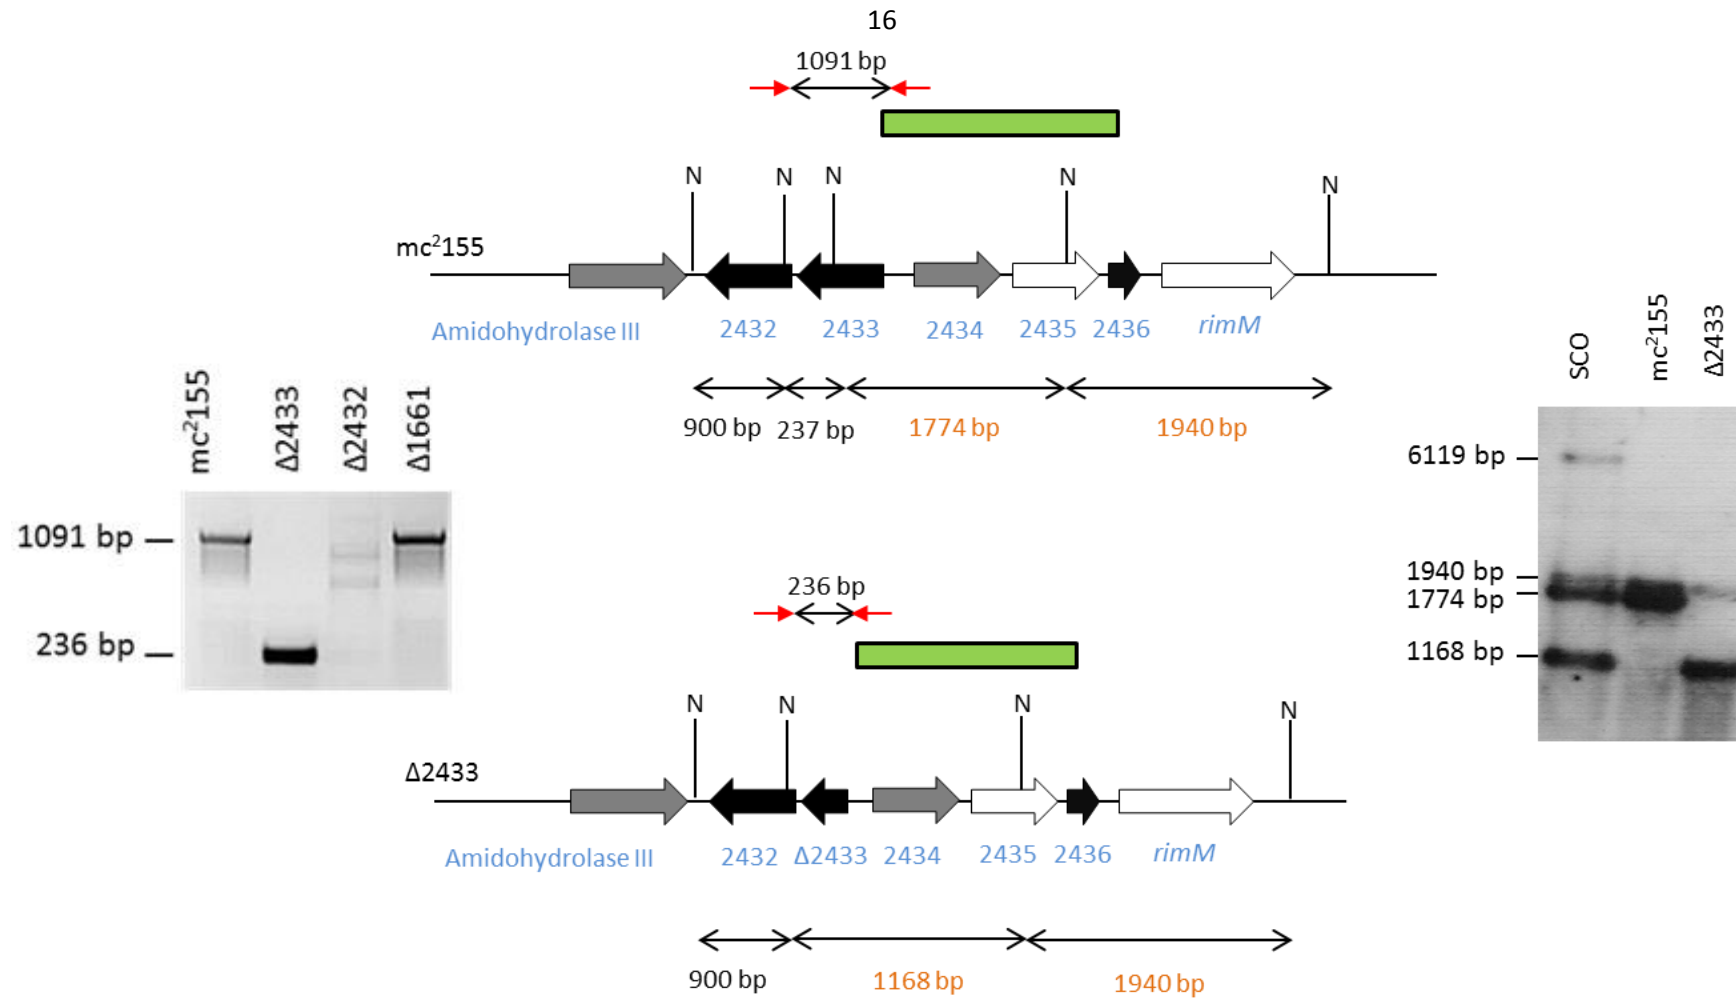

**Figure S3B. Genotypic characterization of the MSMEG\_2433 deletion mutant by PCR and Southern blot analysis.** The genomic map of the relevant locus is shown for the wild-type and mutant strain. Also shown on the left is the PCR confirmation of the genotype and Southern Blotting is shown on the right. For PCR confirmation, chromosomal DNA was used to amplify the MSMEG\_2433 alleles from the wild-type and mutant strains using the primer pairs described in Table S4 and indicated as red arrows above. The expected sizes of the amplicons are as follows: MSMEG\_2433, 1091 bp and  $\Delta$ 2433, 236 bp. For the Southern blot analysis chromosomal DNA from the SCO, parental and mutant strain was digested with *NotI* [N]. The probe used for hybridization is shown as a solid green box and the expected sizes are indicated with orange text. The figures are not drawn to scale.



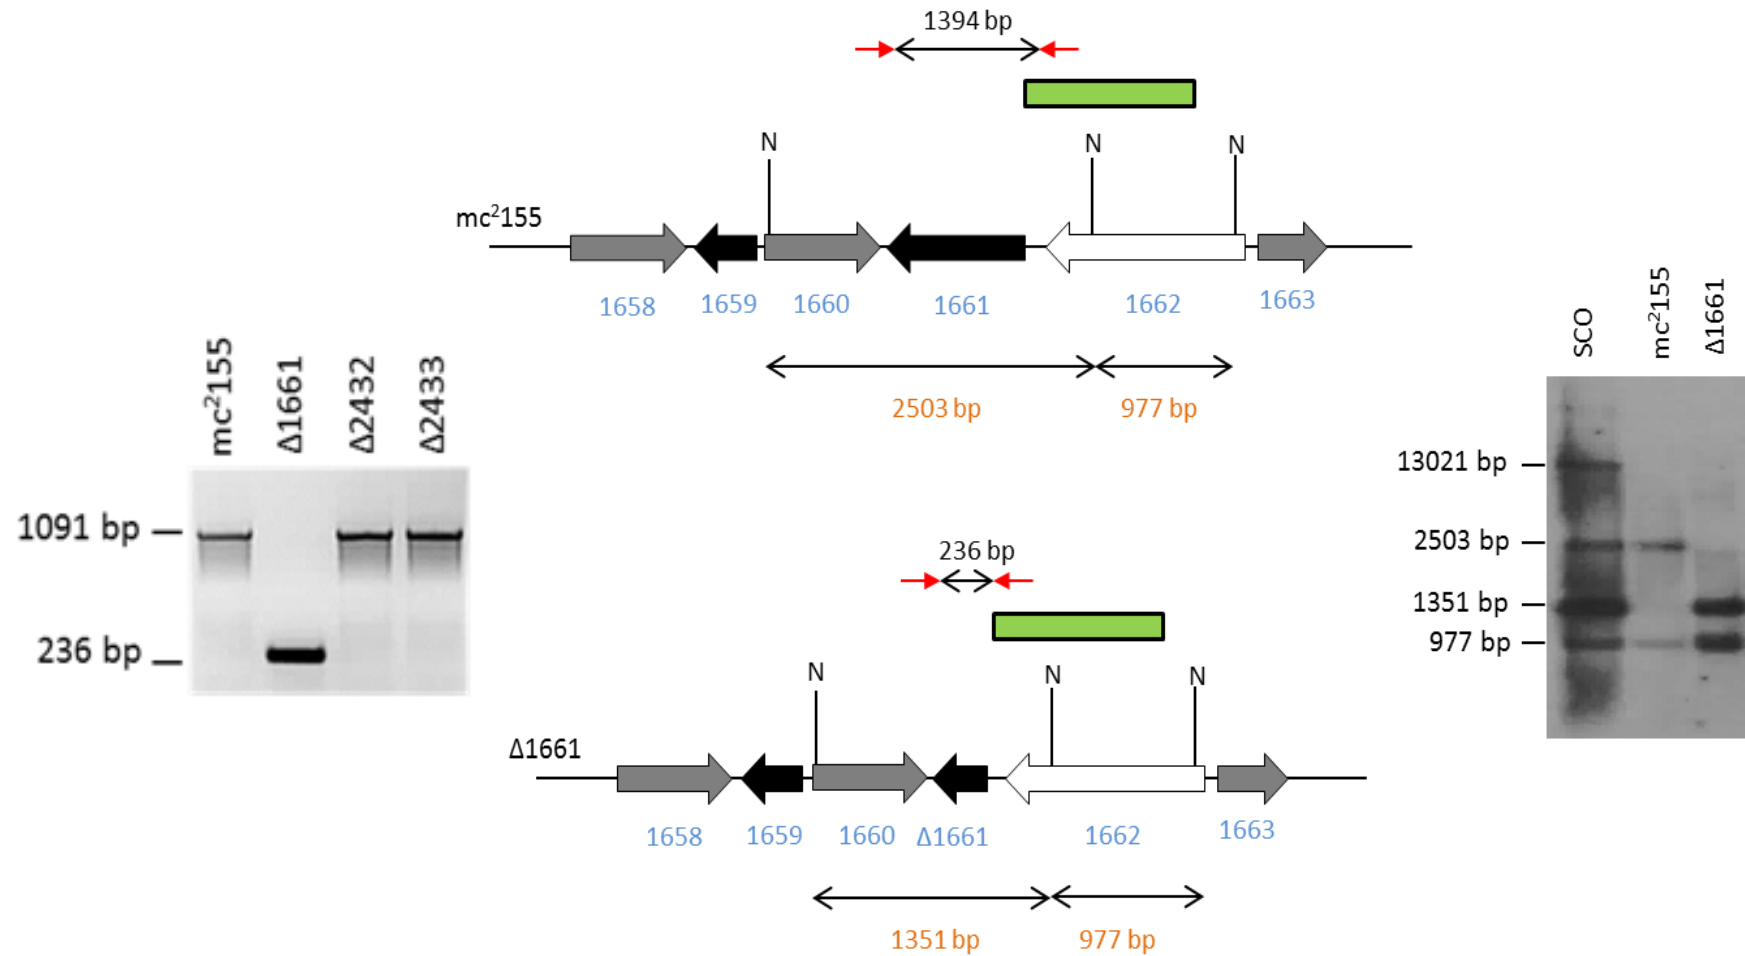

**Figure S3C. Genotypic characterization of the MSMEG\_1661 deletion mutant by PCR and Southern blot analysis.** The genomic map of the relevant locus is shown for the wild-type and mutant strain. Also shown on the left is the PCR confirmation of the genotype and Southern Blotting is shown on the right. For PCR confirmation, chromosomal DNA was used to amplify the MSMEG\_1661 alleles from the wild-type and mutant strains using the primer pairs described in Table S4 and indicated as red arrows above. The expected sizes of the amplicons are as follows: MSMEG\_1661, 1394 bp and Δ1661, 236 bp. For the Southern blot analysis chromosomal DNA from the SCO, parental and mutant strain was digested with *Nco*I [N]. The probe used for hybridization is shown as a solid green box and the expected sizes are indicated with orange text. The figures are not drawn to scale.

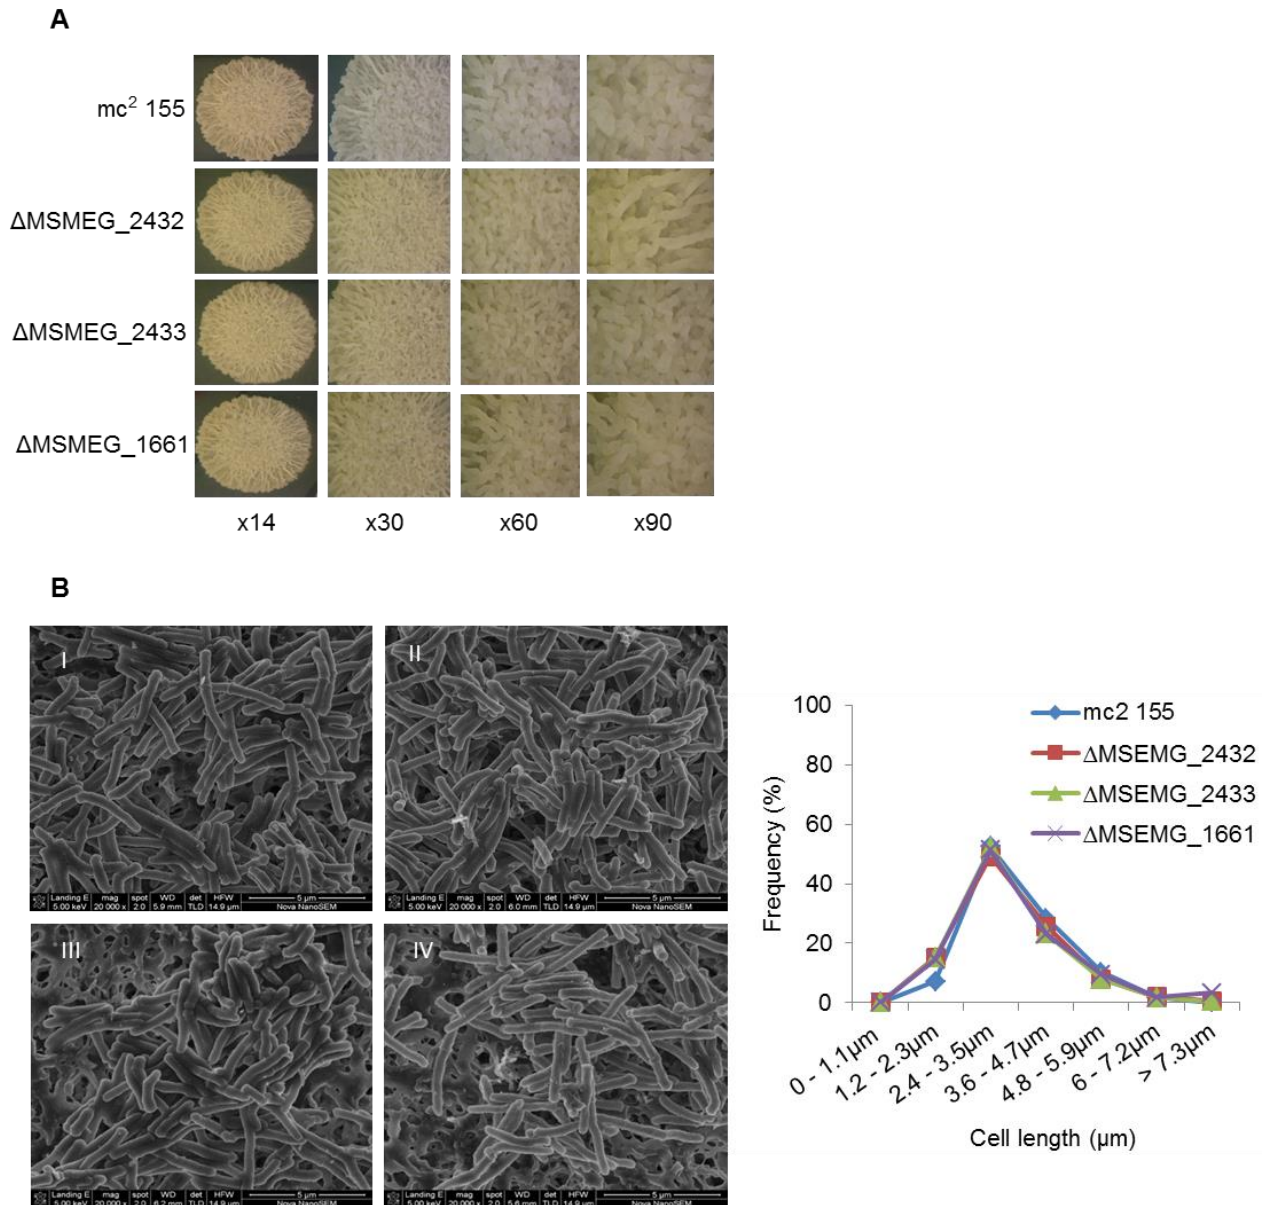

**Figure S4. *In vitro* assessment of phenotypes in single deletion mutants.** (A) Colony morphology of wild-type and single deletion mutants. Strains were grown to  $OD_{600nm}$  of 0.3 and 10  $\mu$ l were subsequently spotted onto 7H10 solid media. Plates were incubated at 37  $^{\circ}$ C for 5 days and growth was monitored daily. (B) Representative SEM micrographs wild-type and mutant strains. Quantitative representation of distribution of cell lengths in wild-type and mutant strains. Number of cells counted for each strain ( $n$ ) = 166, 203, 238 and 179, respectively.

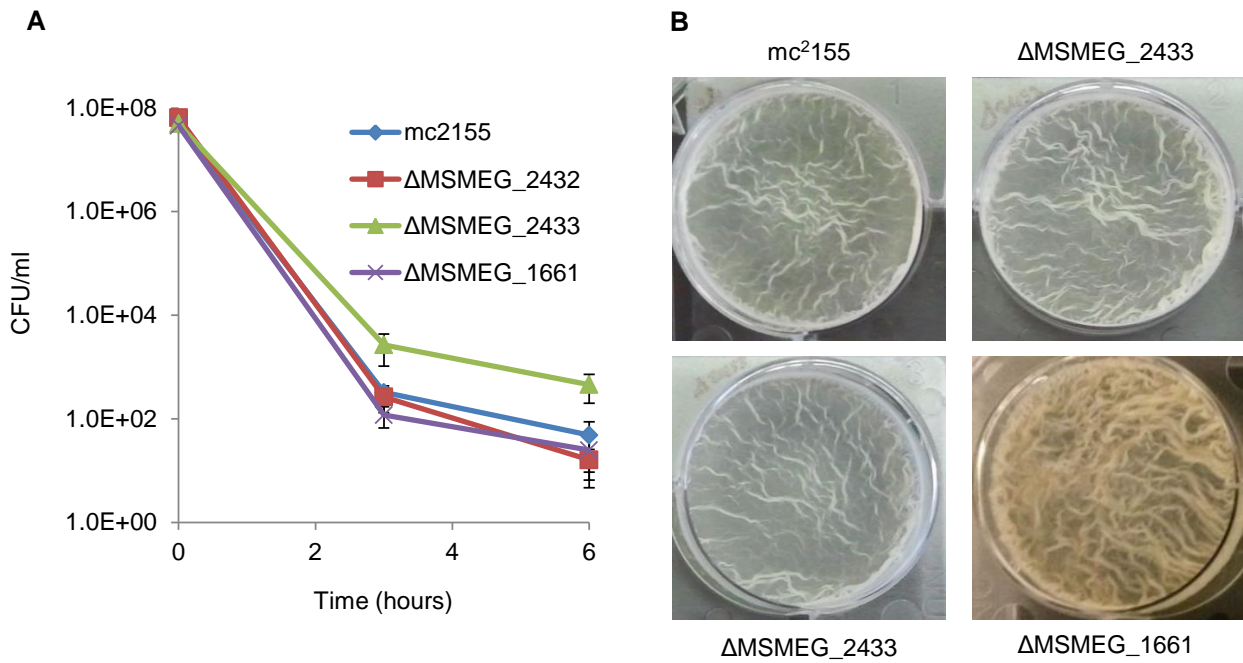

**Figure S5. Assessment of changes in cell wall stability.** (A) SDS killing (0.2%, w/v) of wild-type and single deletion mutant strains. Cultures were grown to  $OD_{600nm}$  of 0.3 following the addition of SDS at time 0. At 3 and 6 hours, 1 ml of sample was removed to prepare 10-fold serial dilutions for plating on 7H10 solid media. The data are the average of three independent experiments plotted with standard errors. (B) Assessment of biofilm formation in DD-CPase mutant strains. Biofilm formation was measured by the formation of a floating pellicle at the liquid-air interface in Sauton's minimal media (pH 7) at 37 °C for 5 days. Images are representative of three biological repeats.

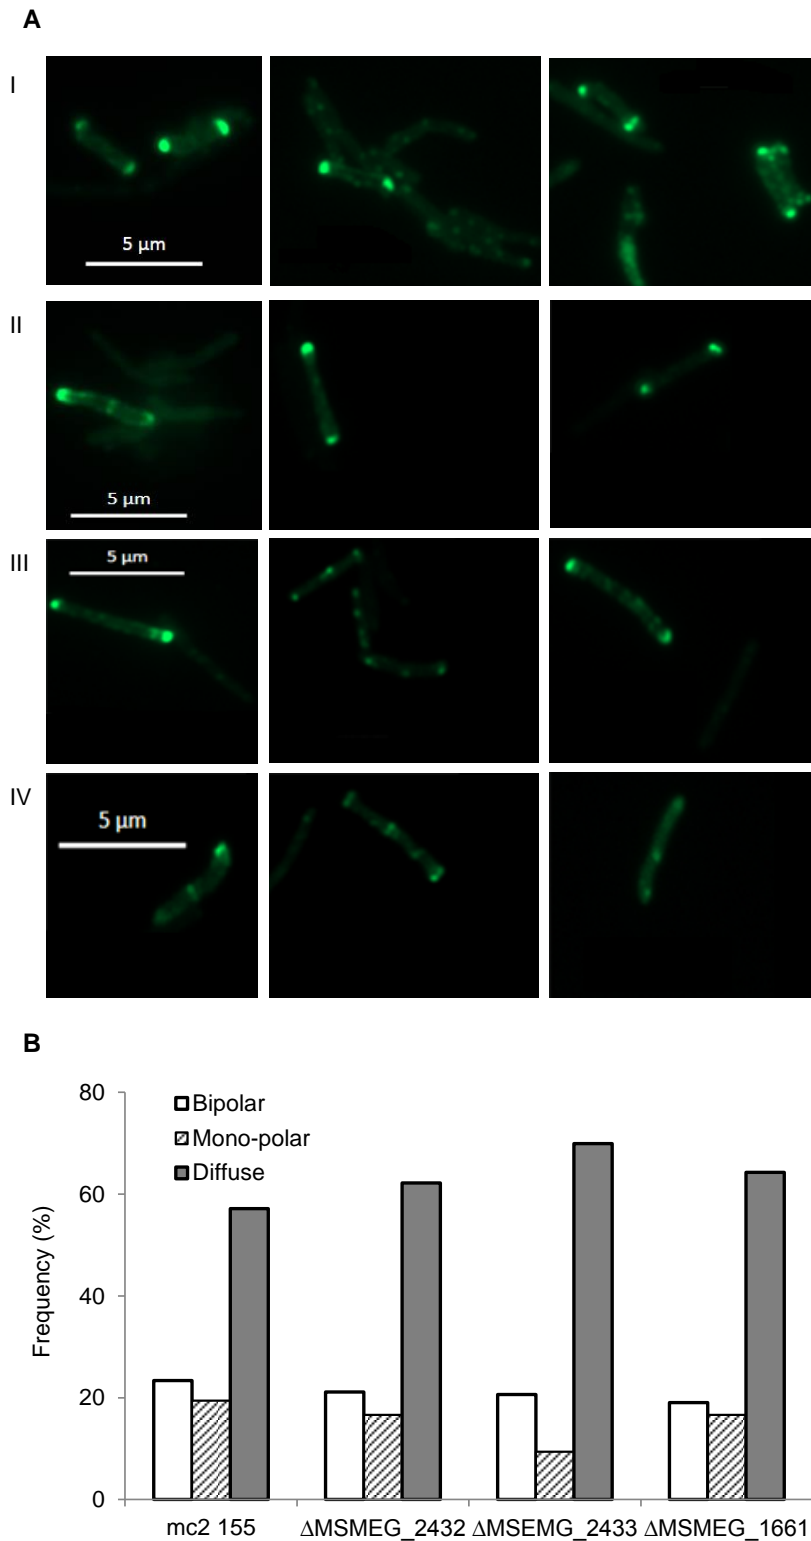

**Figure S6. Fluorescence microscopy and quantitative assessment of peptidoglycan localization in DD-CPase deletion mutants.** (A) BODIPY-vancomycin localization in *M. smegmatis*: (I) Wild-type, (II)  $\Delta 2432$ , (III)  $\Delta 2433$ , (IV)  $\Delta 1661$  mutants. Strains were grown to  $OD_{600nm}$  of 0.3 and then stained with BODIPY-vancomycin, three representative images are shown for each strain. Scale bar = 5  $\mu m$ . (B) Quantitative assessment of the distribution of staining patterns. Data is representative of one biological repeat where  $n$  (number of cells counted for each strain) = 77, 84, 90 and 223 for wild-type,  $\Delta MSMEG_{2432}$ ,  $\Delta MSMEG_{2433}$  and  $\Delta MSMEG_{1661}$  respectively.

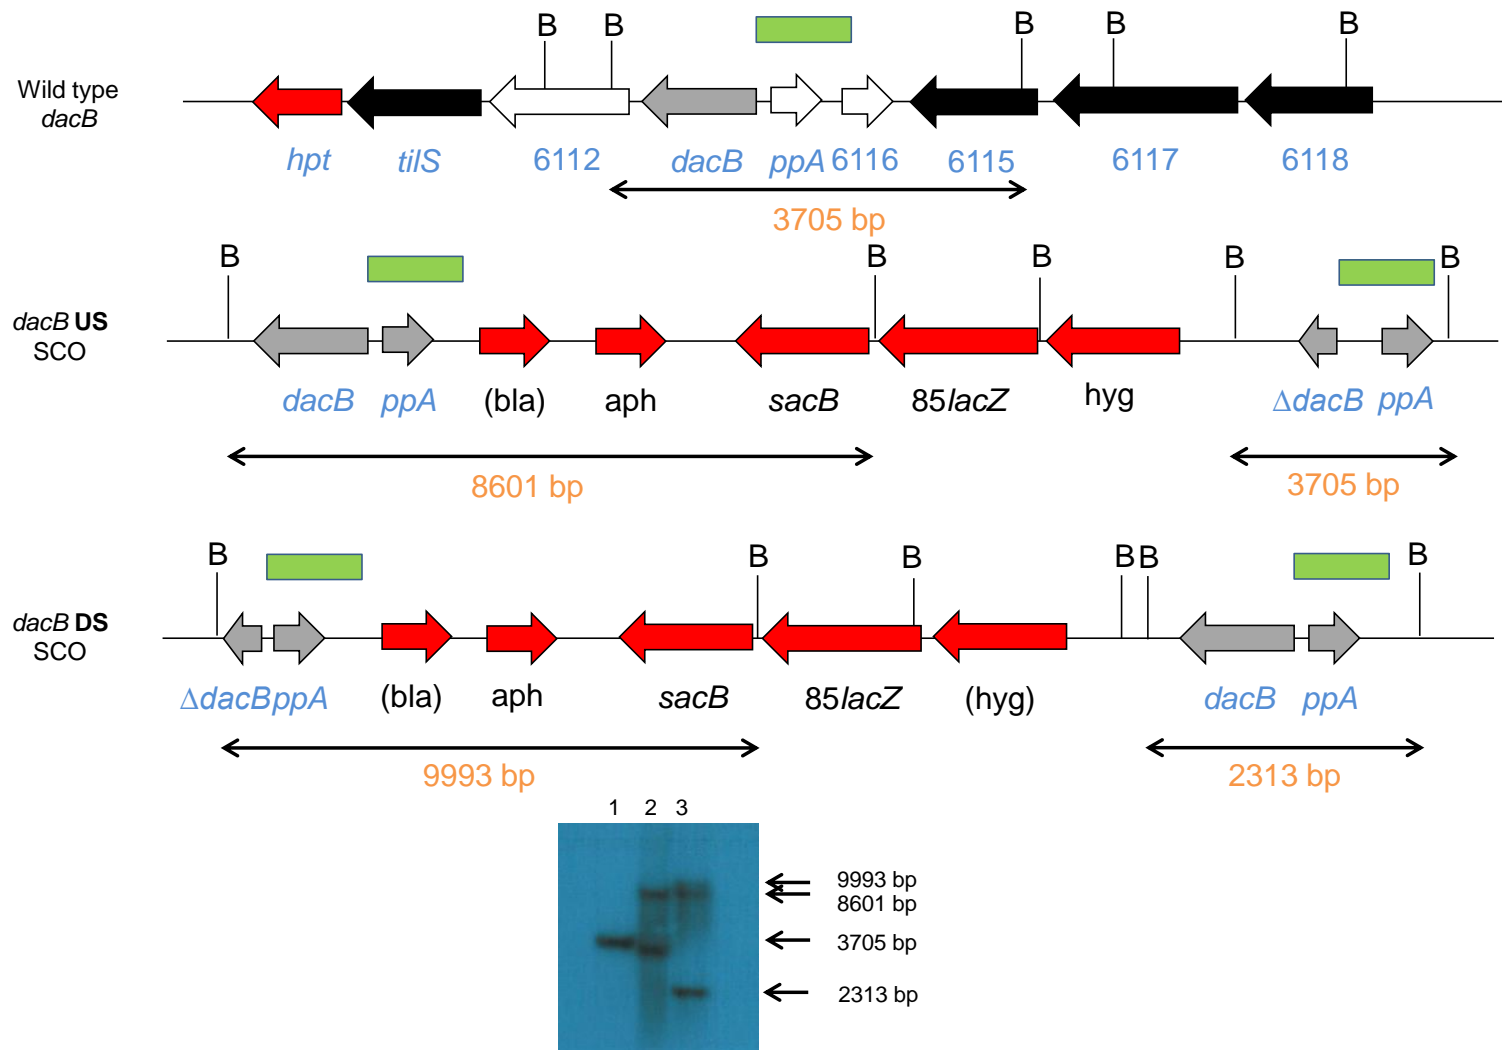

**Figure S7A. Southern blot to confirm upstream and downstream SCOs for *dacB* mutant.** Shown are the genomic maps for the wild-type, upstream (US) single crossover (SCO) and downstream (DS) SCO. Chromosomal DNA was isolated from wild-type (1), US SCO (2) and DS DSCO (3) and digested with *Bam*HI. The probe used for hybridization is shown as a solid green box and the expected sizes are indicated in orange text.

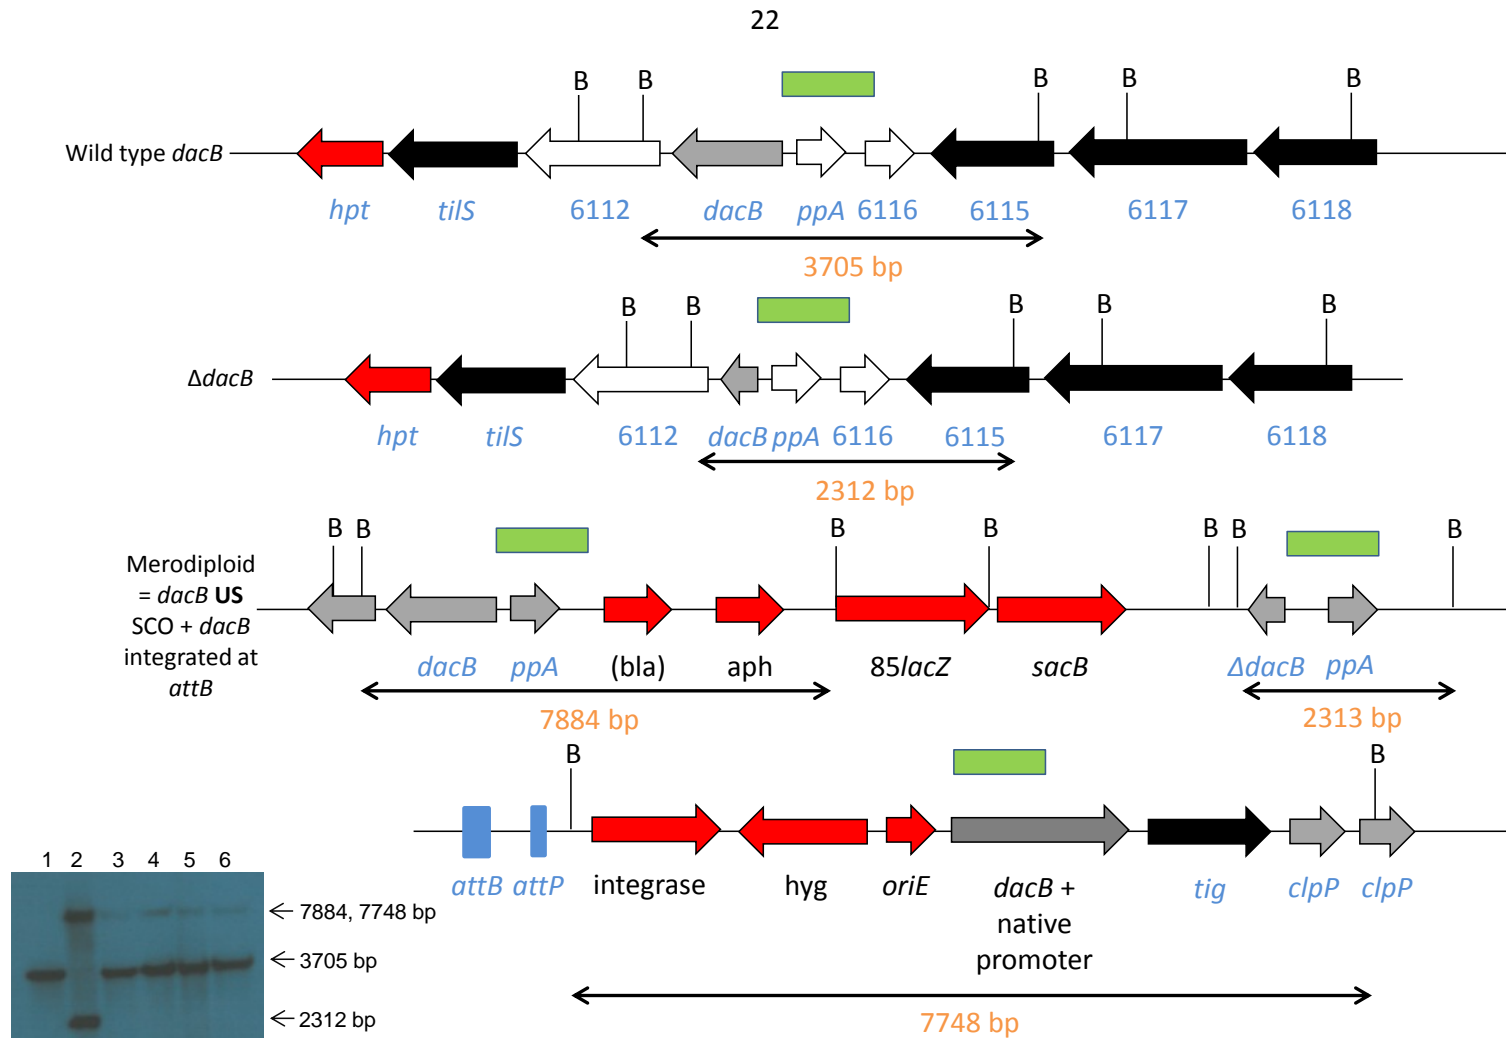

**Figure S7B. Attempts to delete *dacB* in a merodiploid strain containing an additional copy of *dacB*, inserted at the *attB* site.** Shown are genomic maps corresponding to wild-type,  $\Delta$ *dacB*, the upstream single crossover (SCO) and resulting merodiploid strain. Southern hybridizations were performed by digesting 2  $\mu$ g of chromosomal DNA isolated from the wild-type (1), the merodiploid strain (2) and possible double crossover recombinants isolated from counter selection of the merodiploid strain (3-6), was digested with *Bam*HI and probed with a region homologous to 1.2 kb upstream of *dacB* (green box). Expected fragment sizes are indicated in orange text. Counter selection yielded the wild-type (3705 bp) and not the mutant (2312 bp) band. Figure not drawn to scale.

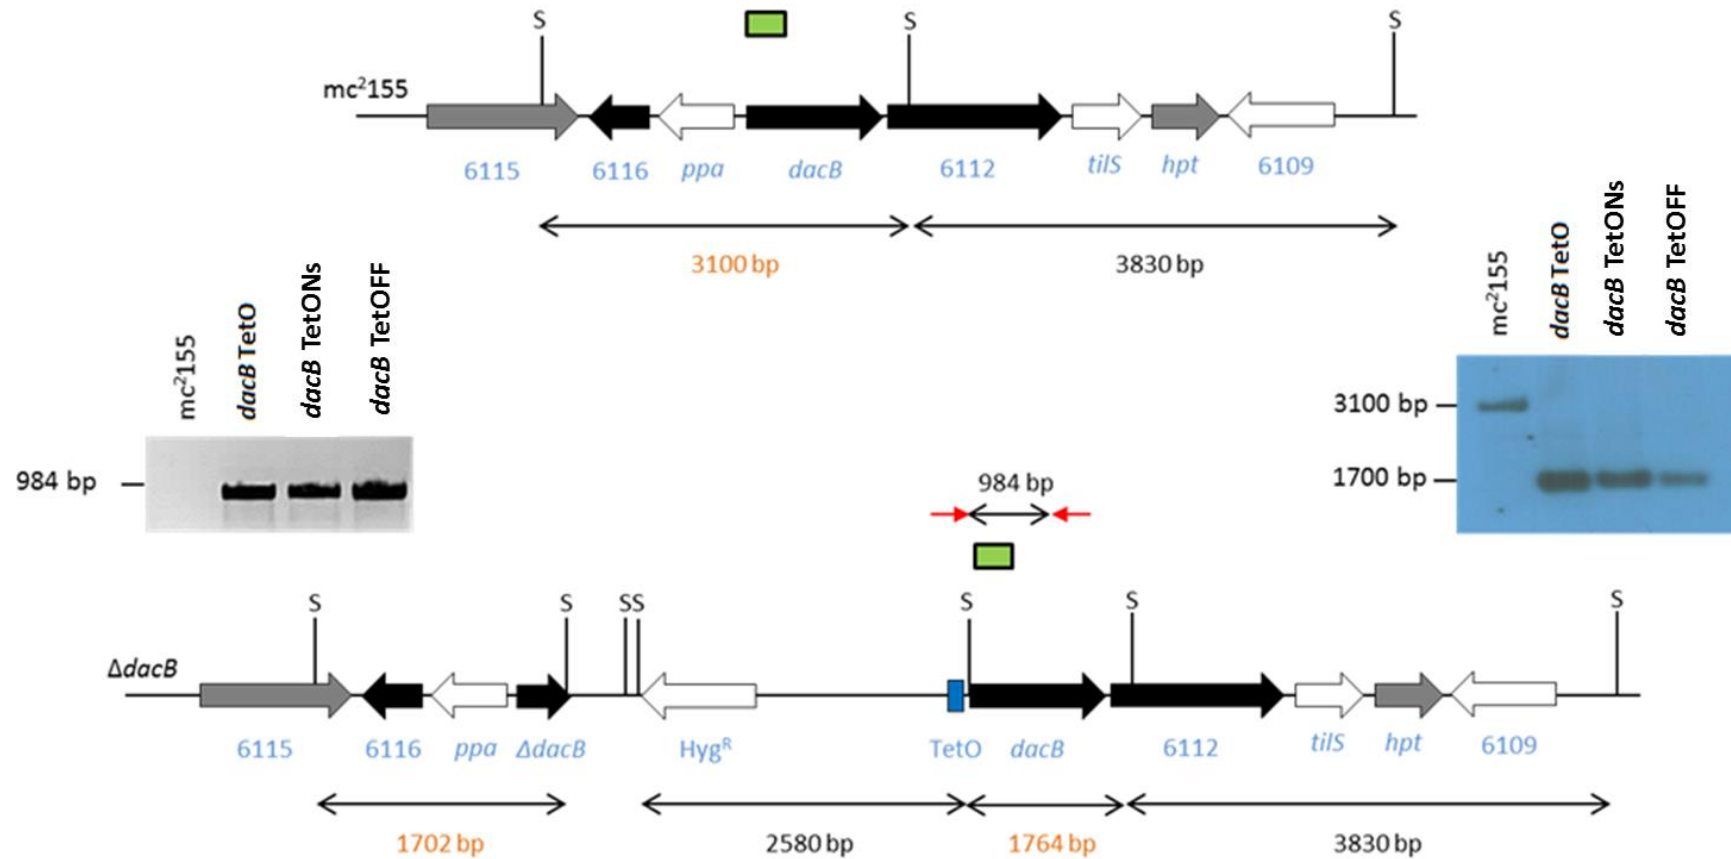

**Figure S8. Genotypic characterization of the MSMEG\_6113 (*dacB*) promoter replacement mutant by PCR and Southern blot analysis.** The genomic map of the relevant locus is shown for the wild-type and mutant strain. Also shown on the left is the PCR confirmation of the genotype and Southern blotting is shown on the right. For PCR confirmation, chromosomal DNA was used to yield an amplicon specific for *dacB* directly downstream of Pmyc1tetO from the mutant strains (absent in wild-type) using the primer pairs described in Table S4, shown as red arrows. The expected sizes of all amplicons are 984 bp. For the Southern blot analysis chromosomal DNA from the parental and mutant strains were digested with *Sma*I [S]. The probe used for hybridization is shown as a solid green box and the expected sizes are indicated with orange text. The figures are not drawn to scale.

A

wild-type

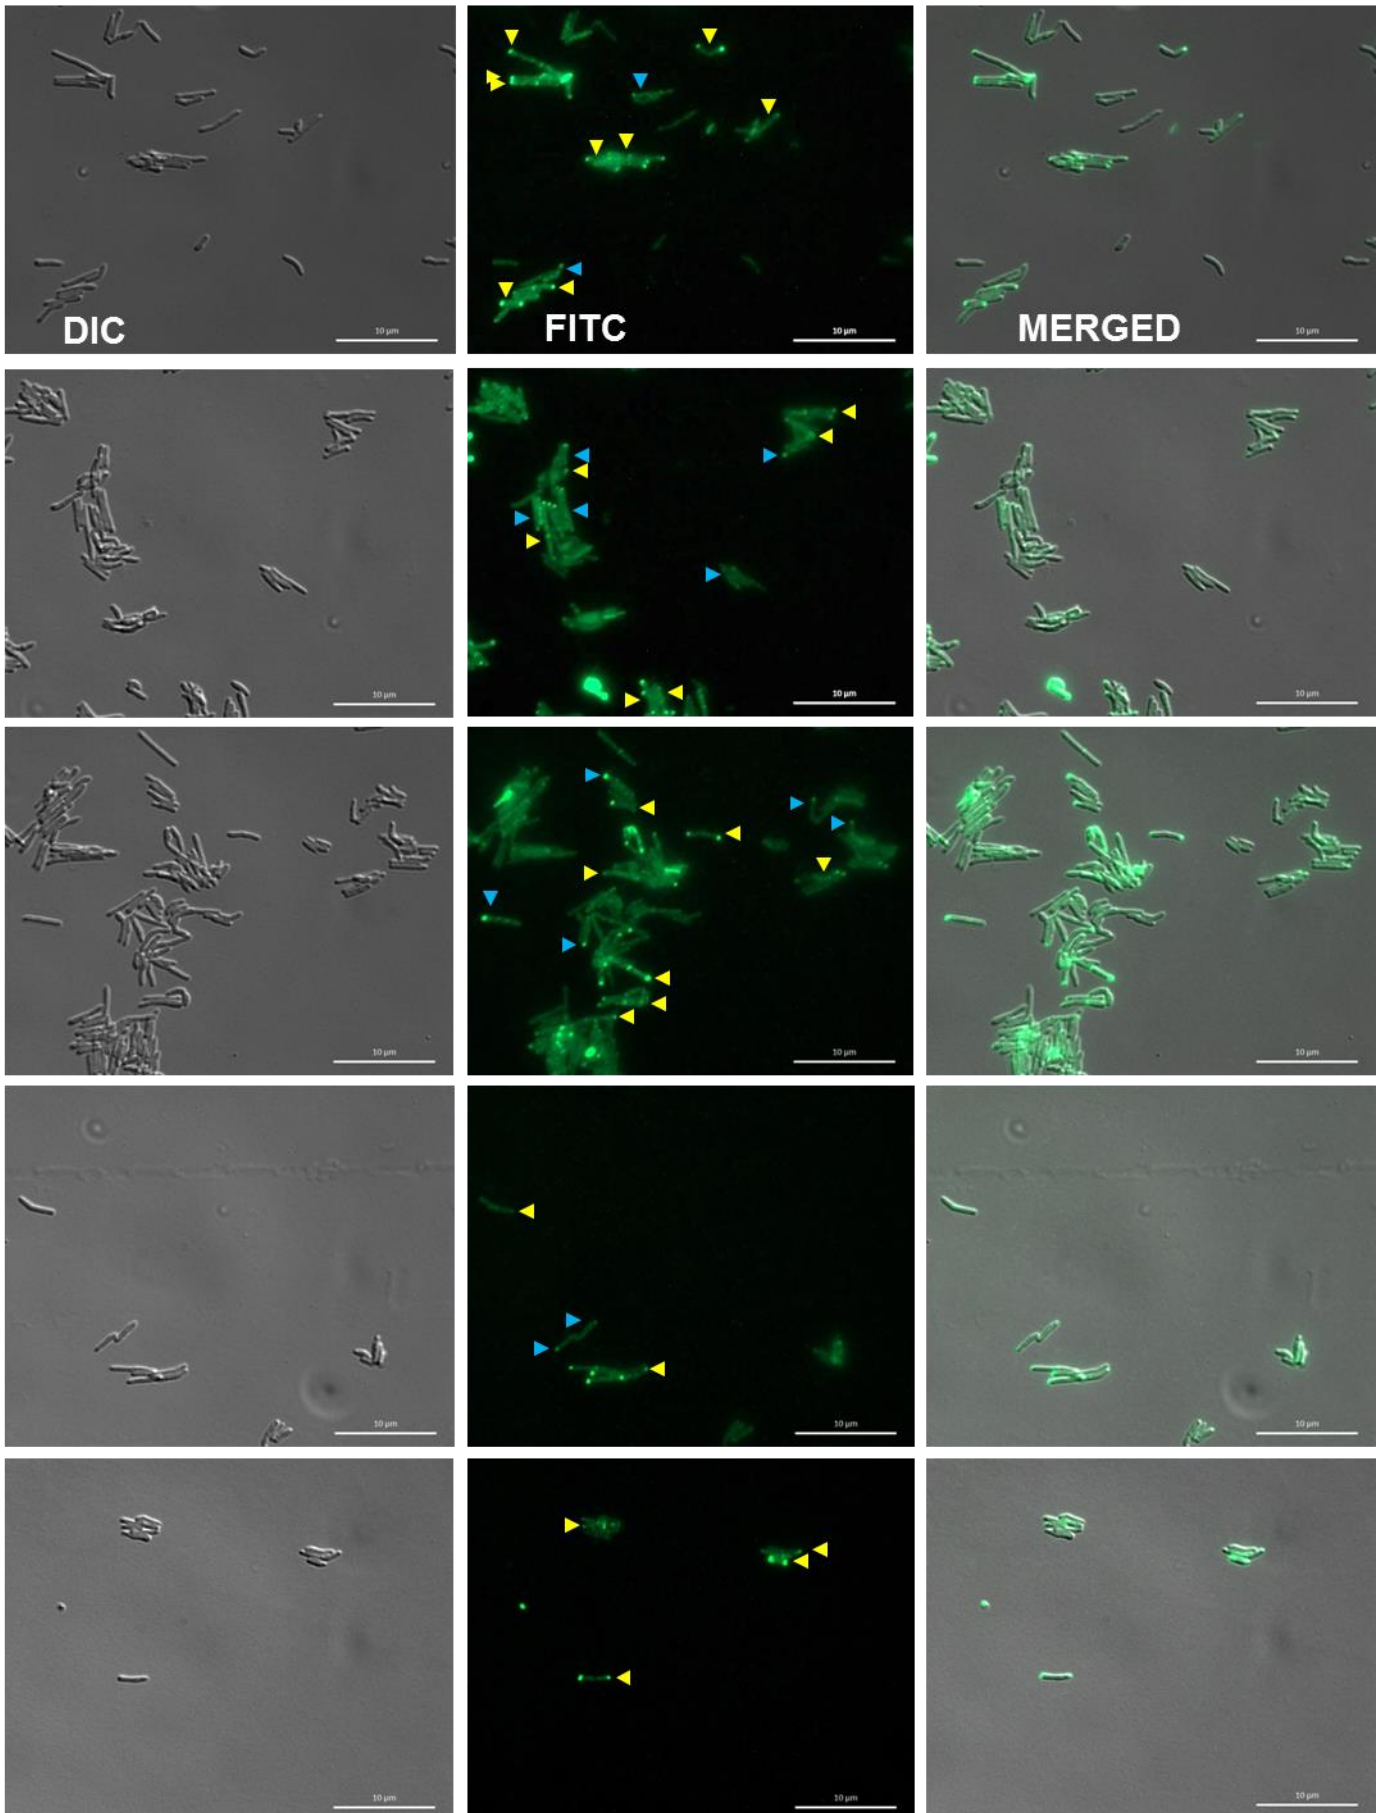



wild-type

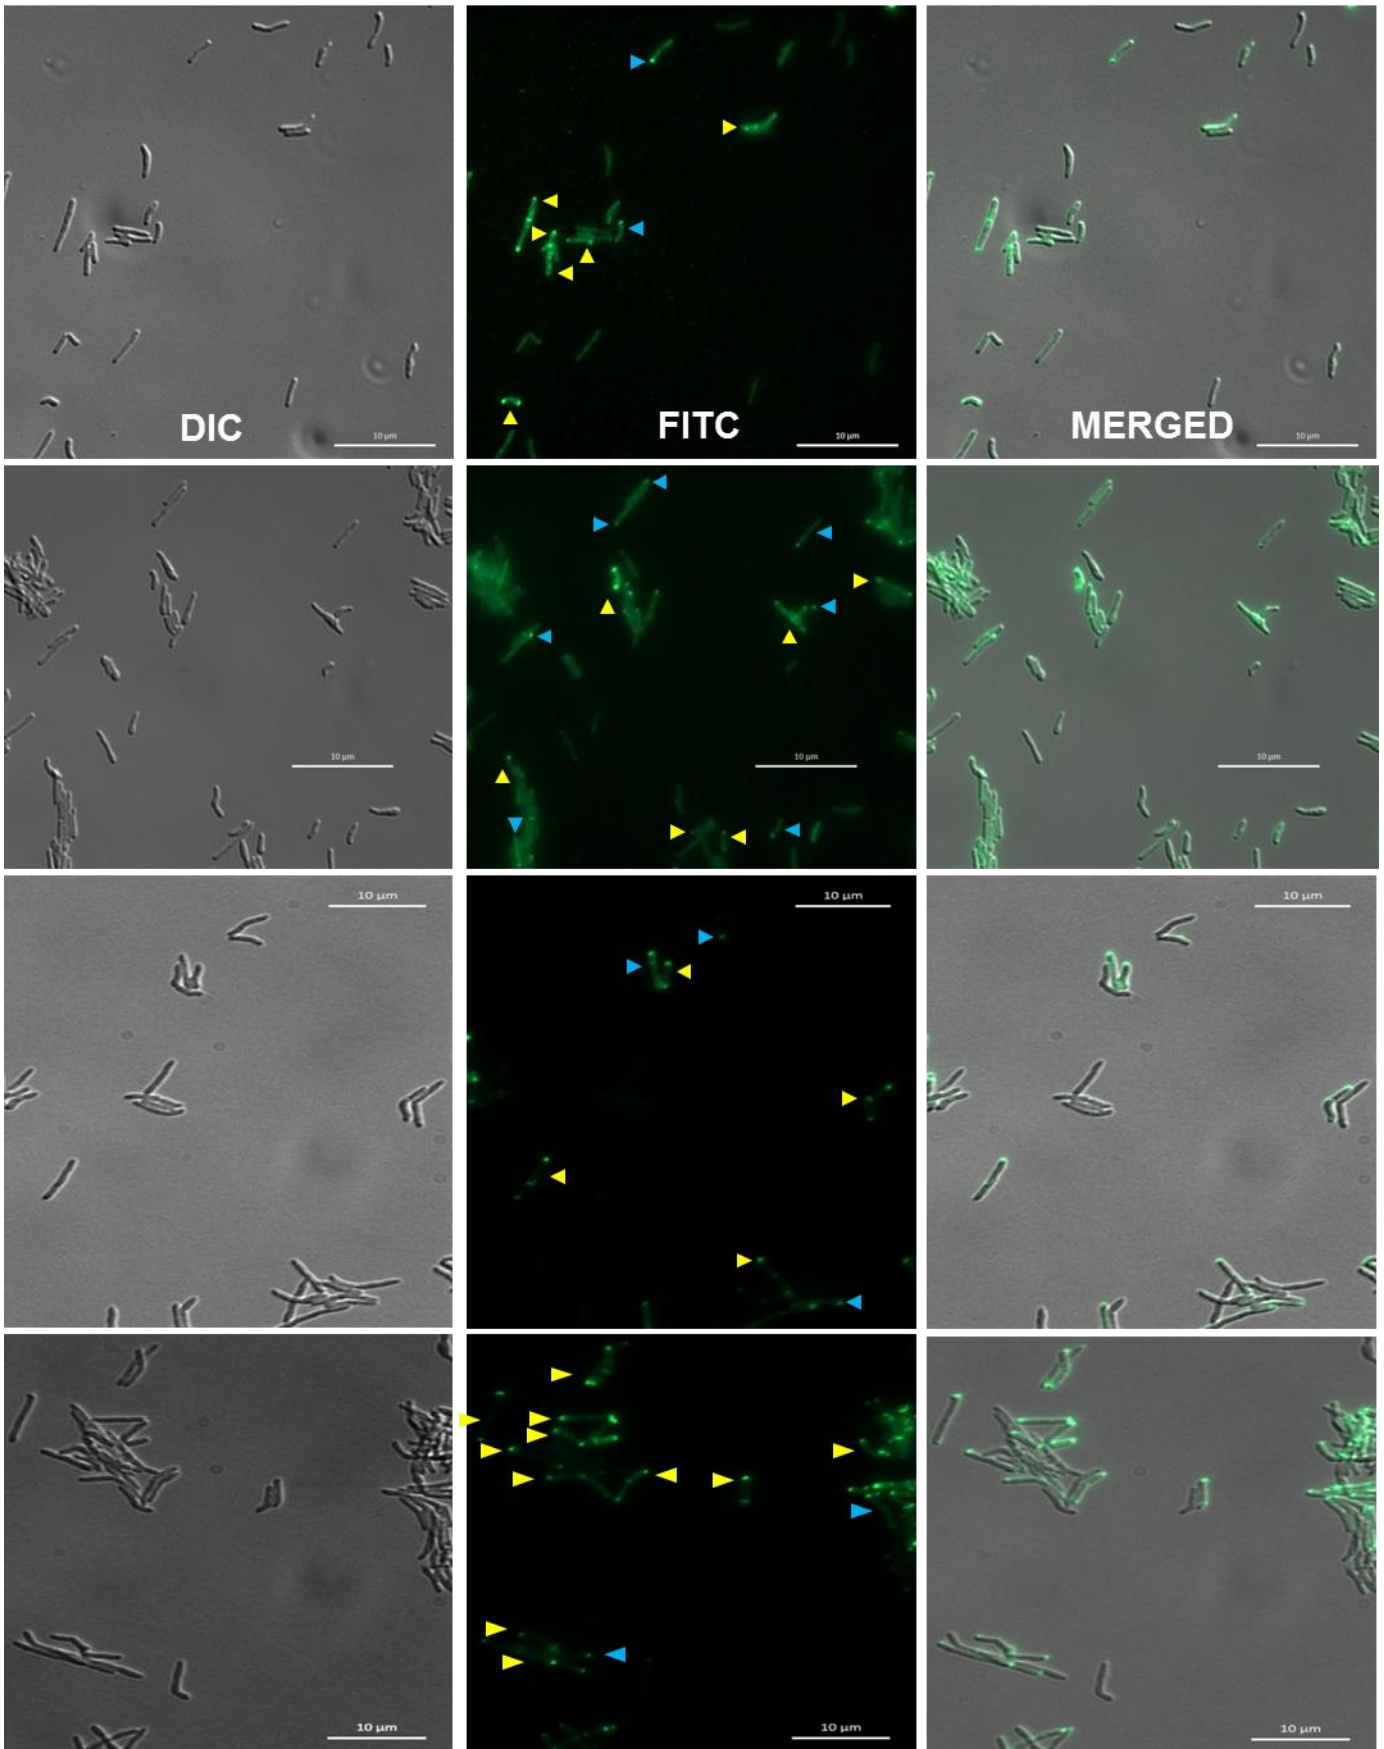

**B***dacB* TetONs - repressed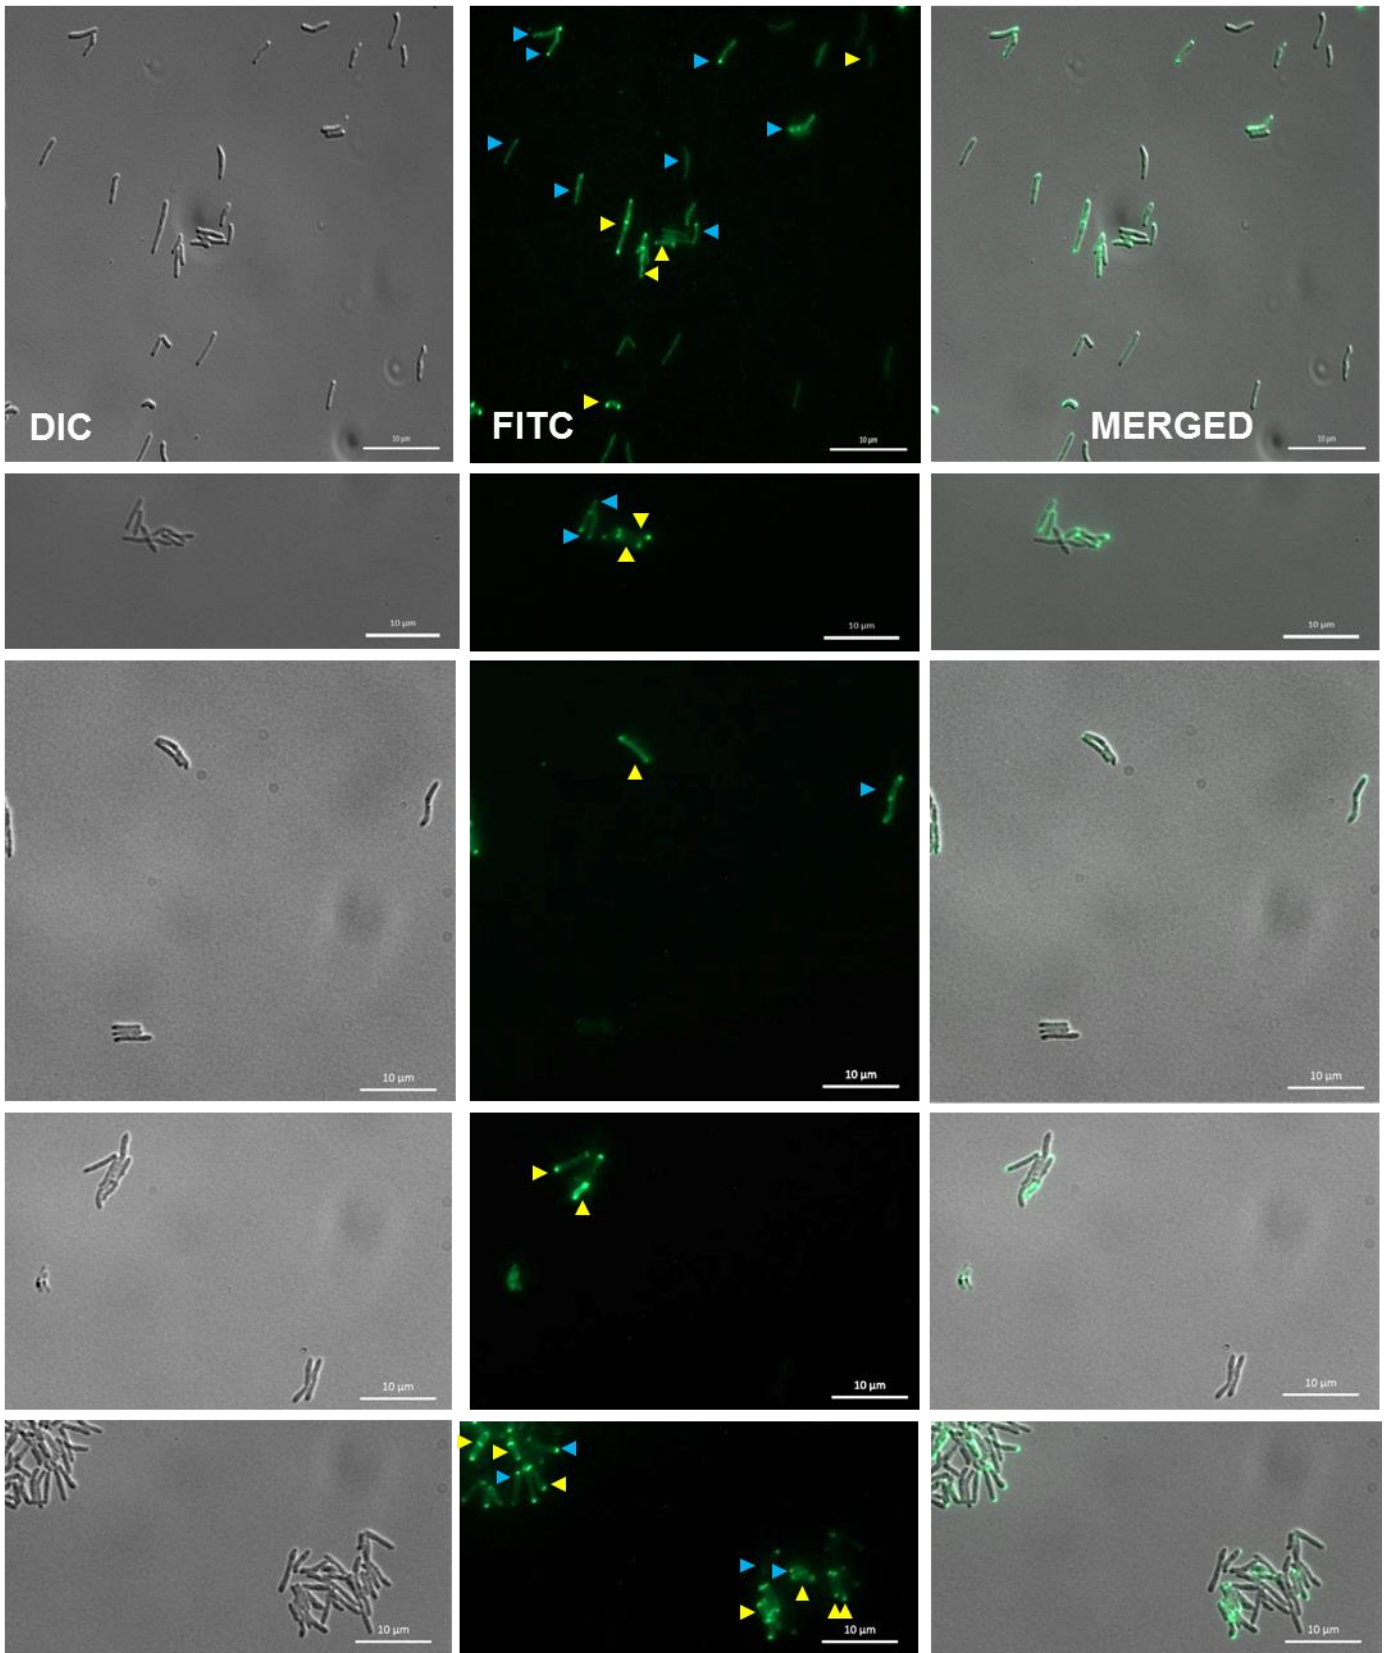

*dacB* TetONs - repressed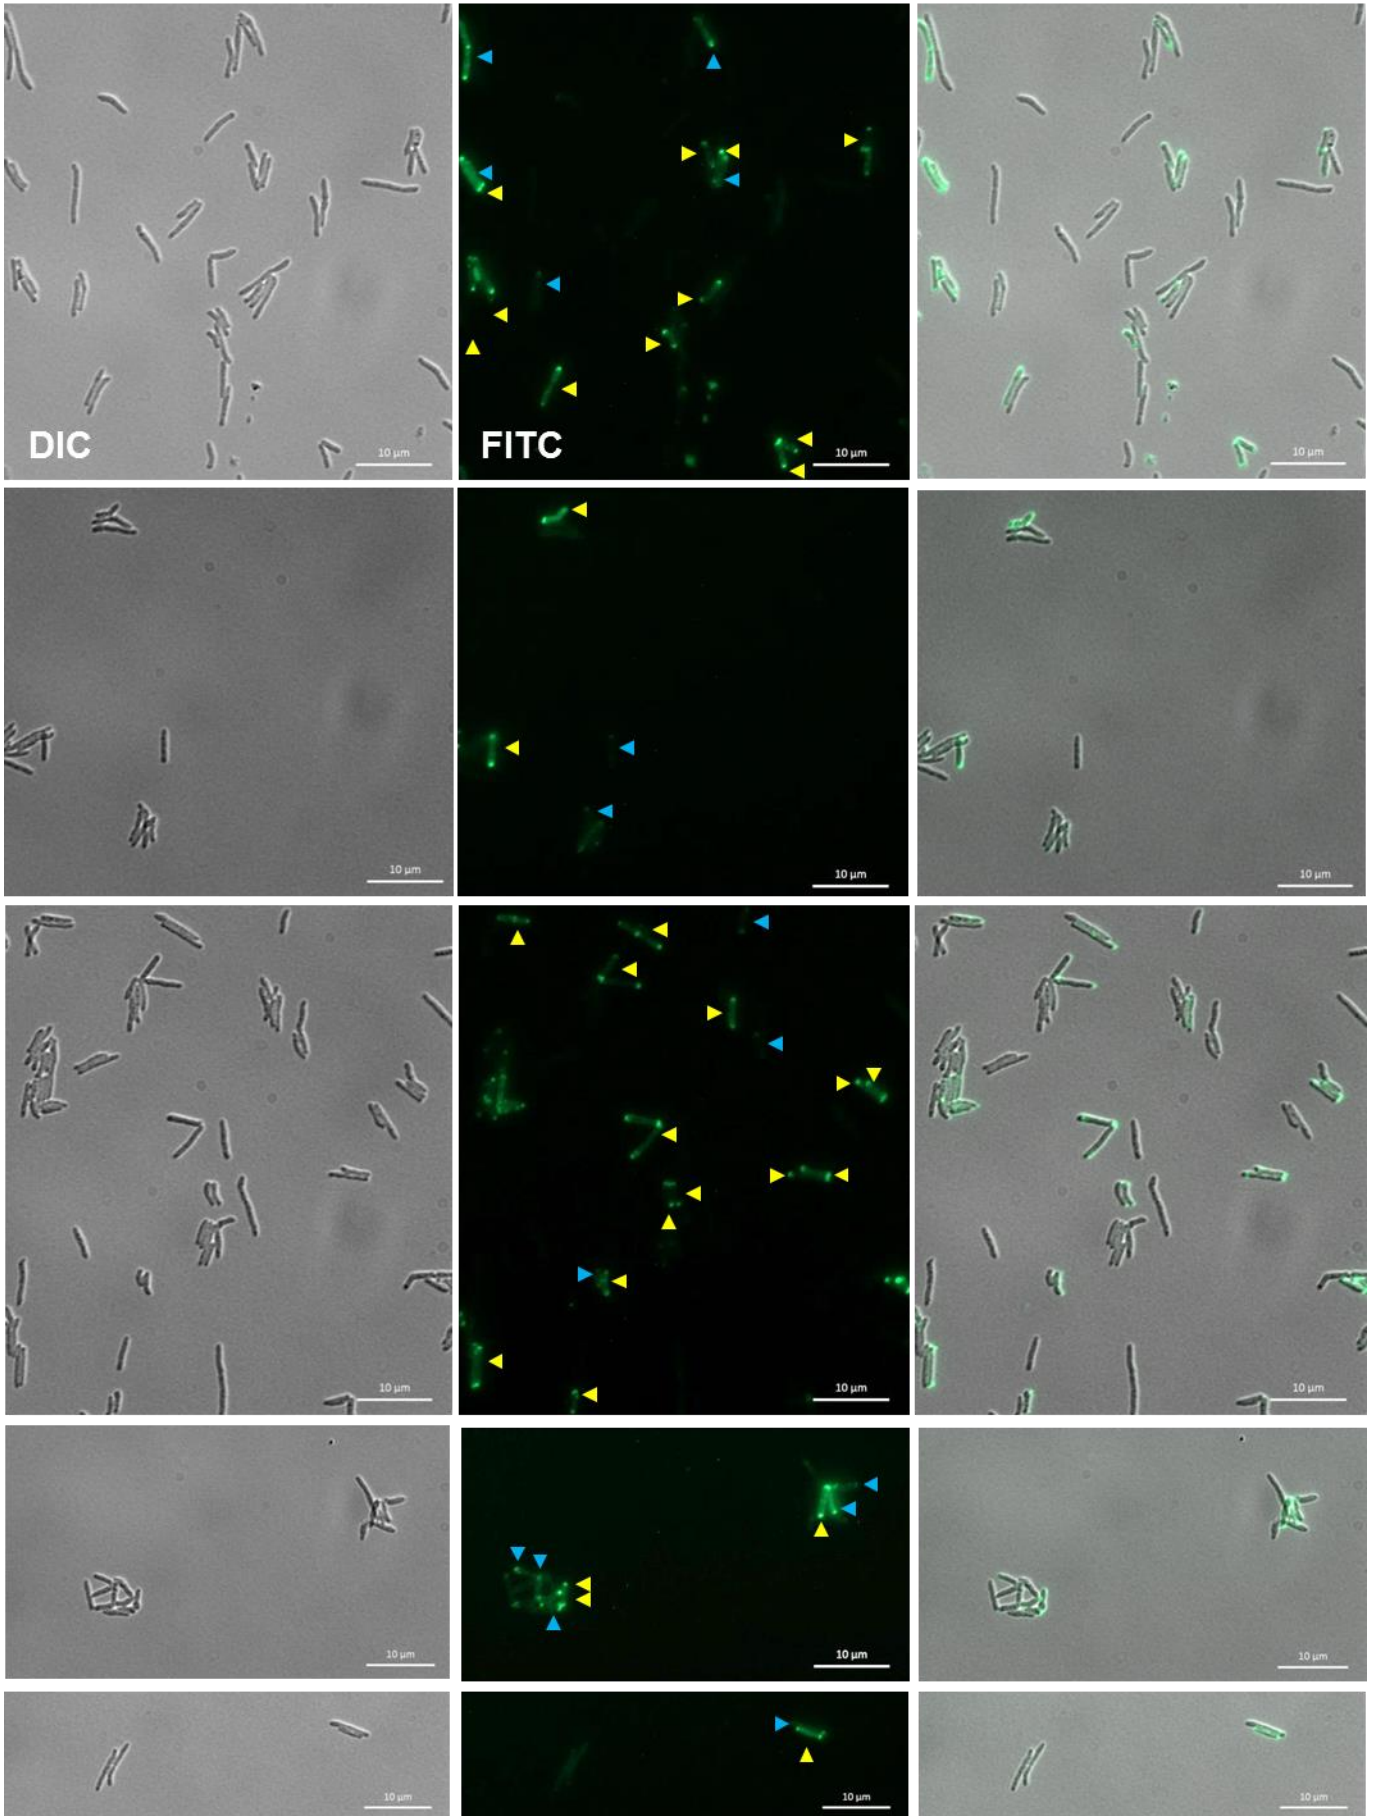

**C***dacB* TetOFF - repressed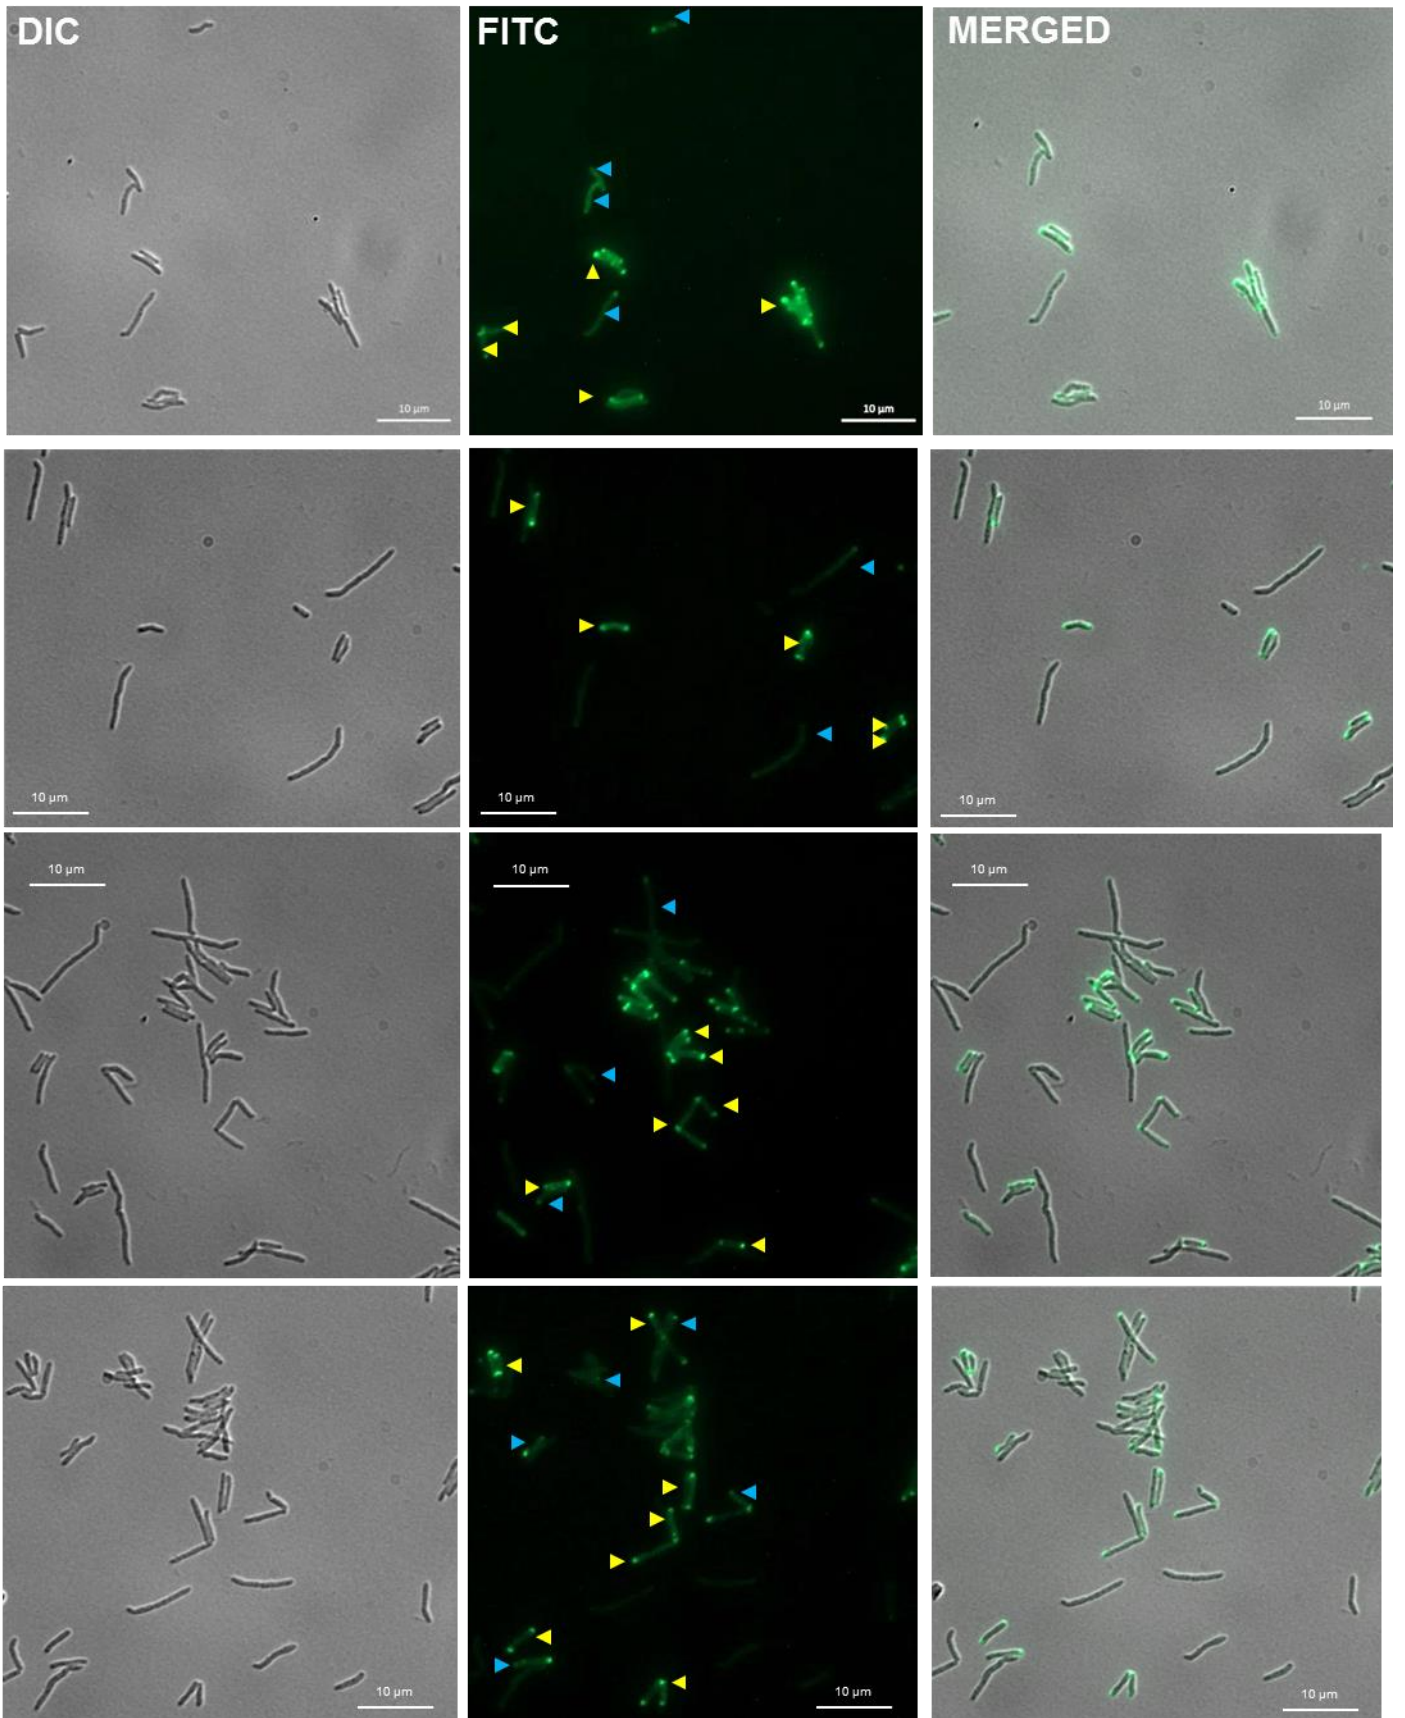

*dacB* TetOFF – repressed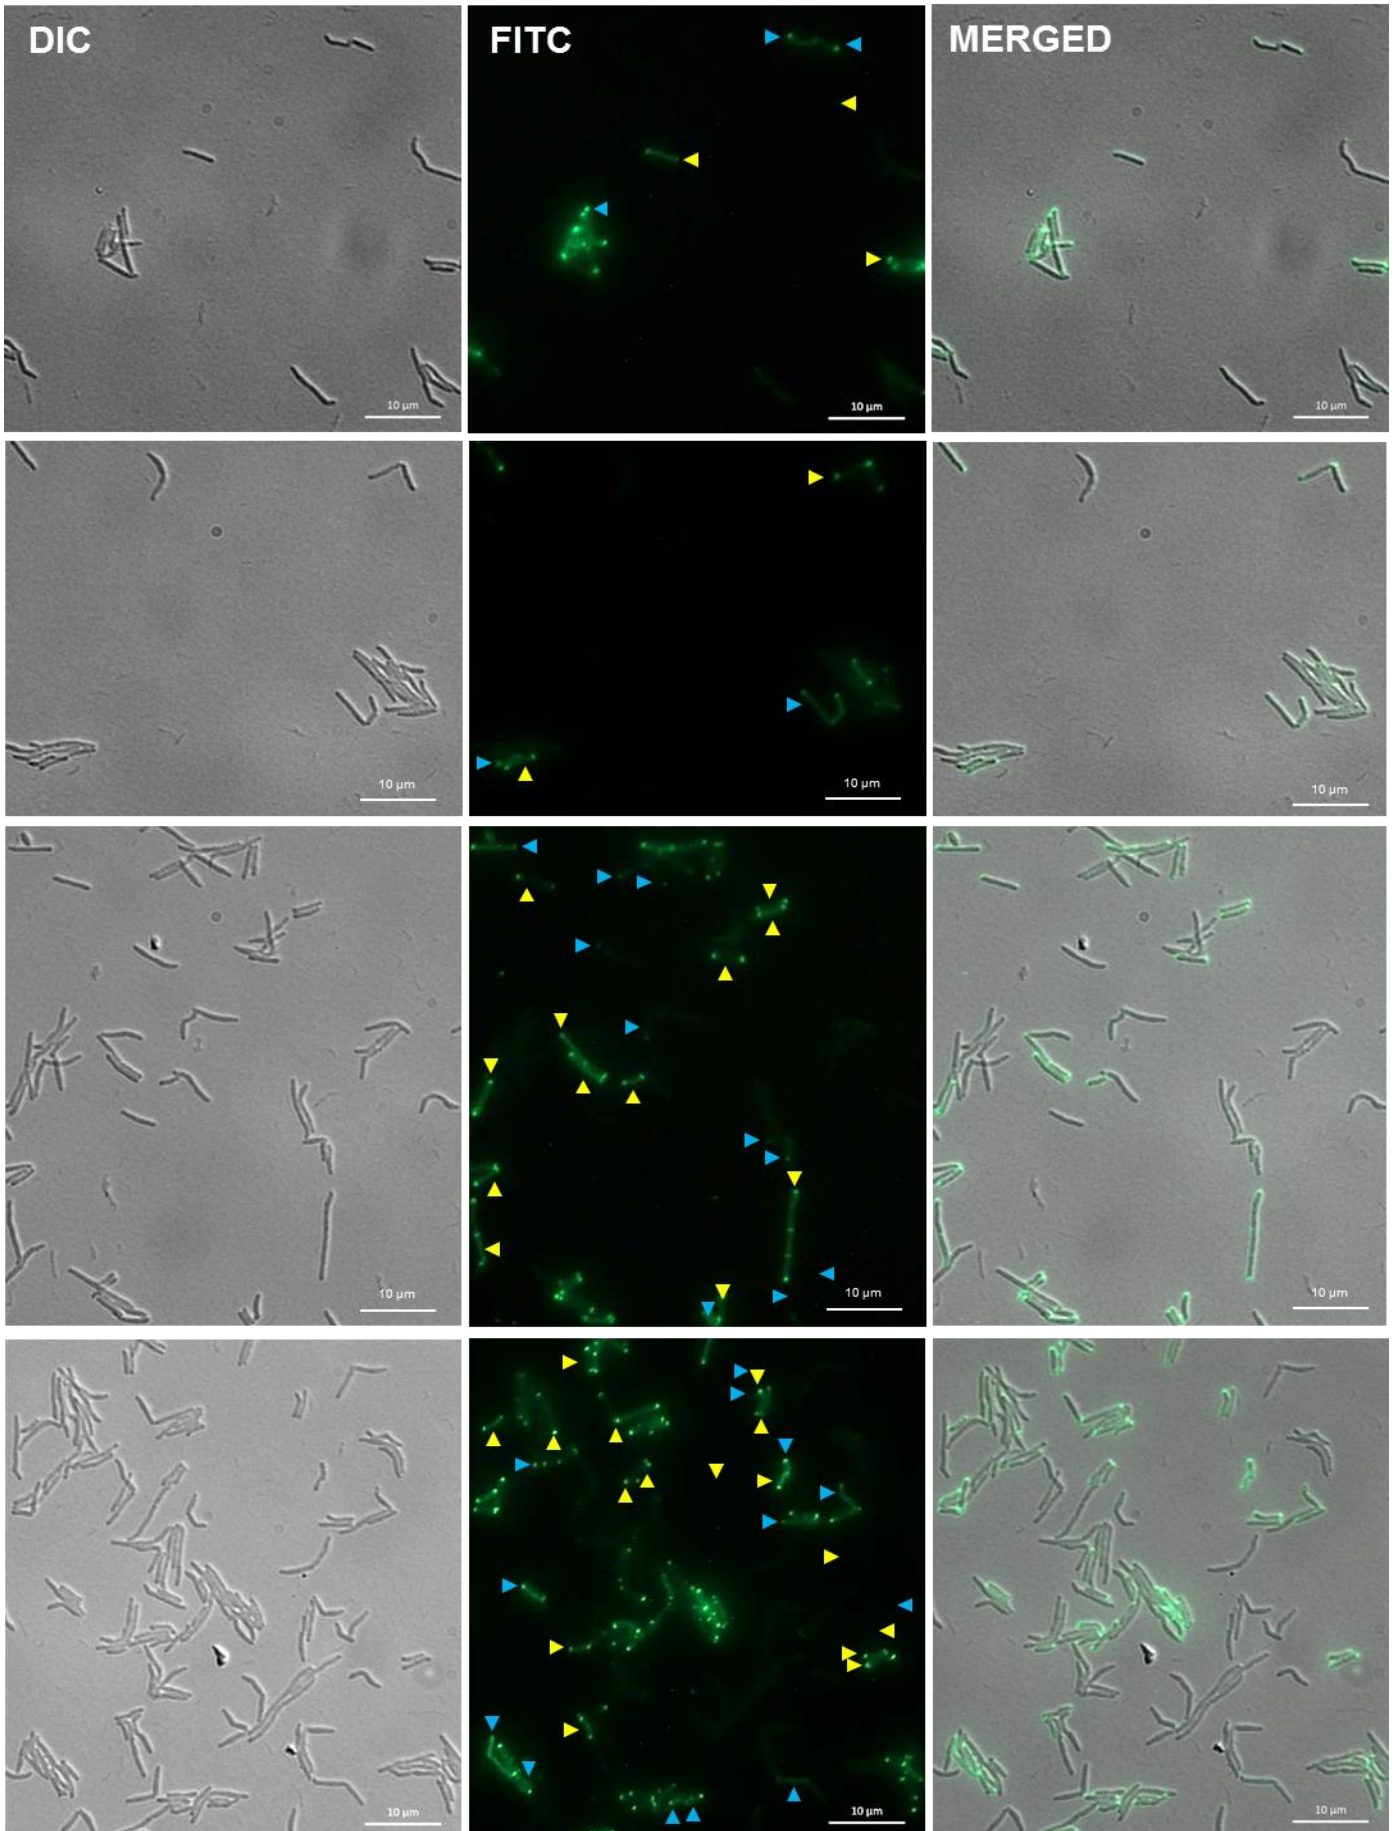

**Figure S9. Representative images of PG staining patterns observed in *dacB* knockdown strains.** Cells corresponding to the wild-type (A), *dacB* TetON<sub>s</sub> 0 ng/ml aTc (repressed) (B) and *dacB* TetOFF 100 ng/ml aTc (repressed) (C) were stained with BODIPY-vancomycin during late logarithmic growth. Images were captured in the DIC and FITC channels and staining patterns were quantitated as either bipolar (yellow arrows) or monopolar (blue arrows). Scale bars depicted in each image.

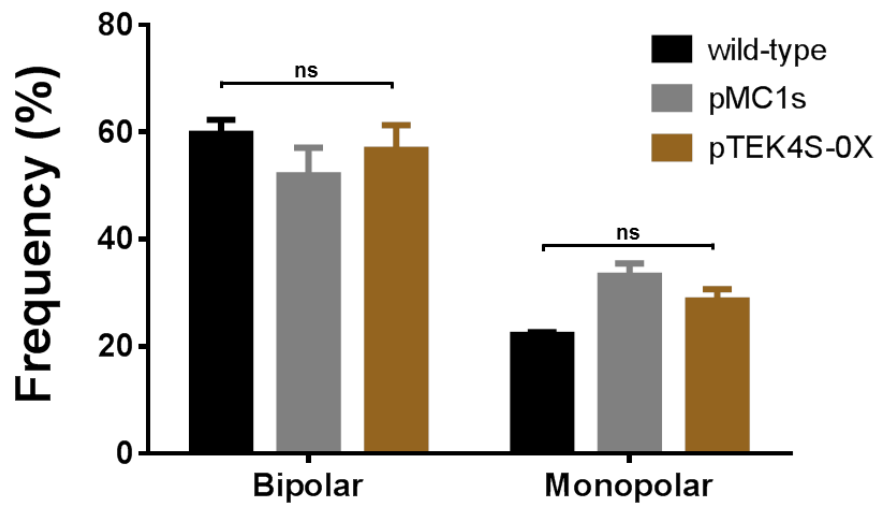

**Figure S10. BODIPY-vancomycin staining of wild-type and repressor only (pMC1s or pTEK4S-0X) strains.** Strains were sampled during late logarithmic growth and stained. Staining patterns were viewed under bright-field (DIC) and FITC-channels and scored as bipolar or monopolar. Data are represented as the average of three independent biological repeats with error bars depicting standard error from the mean. No statistically (ns) significant differences were detected, comparing strains in each staining type.

**References**

1. Snapper, S., Melton, R., Mustafa, S., Kieser, T. & Jacobs Jr., W. Isolation and characterization of efficient plasmid transformation mutants of *Mycobacterium smegmatis*. *Mol Microbiol* **4**, 1911–9 (1990).
2. Parish, T. & Stoker, N. Use of a flexible cassette method to generate a double unmarked *Mycobacterium tuberculosis* tlyA plcABC mutant by gene replacement. *Microbiology* **146**, 1969–75 (2000).
